# Supplementary material
Source: PubMed Central journal article supplement (PMC6550487)
Supplement: NIHMS1509571-supplement-1.pdf [file NIHMS1509571-supplement-1.pdf]

## PUBERTAL TIMING TRANSDIAGNOSTIC

Table S1. Syndrome based model (w/o syndrome factor co-variance).

| Factor                             | Indicator           | Unstandardized Loading         | SE          | Est./SE        | p           | Standardized Loading         | SE         | Est./SE        | p               |
|------------------------------------|---------------------|--------------------------------|-------------|----------------|-------------|------------------------------|------------|----------------|-----------------|
| <b>Depression</b>                  | CDI C               | 0.71                           | 0.06        | 12.12          | <.001       | .41                          | .03        | 12.58          | <.001           |
|                                    | CDI P               | 0.71                           | 0.06        | 12.12          | <.001       | .47                          | .04        | 12.13          | <.001           |
| <b>Physical Symptoms (Anxiety)</b> | MASC PH C           | 0.63                           | 0.07        | 9.66           | <.001       | .38                          | .04        | 10.77          | <.001           |
|                                    | MASC PH P           | 0.63                           | 0.07        | 9.66           | <.001       | .45                          | .04        | 10.62          | <.001           |
| <b>Social Anxiety</b>              | MASC SA C           | 0.80                           | 0.07        | 11.96          | <.001       | .48                          | .03        | 14.04          | <.001           |
|                                    | MASC SA P           | 0.80                           | 0.07        | 11.96          | <.001       | .48                          | .03        | 14.26          | <.001           |
| <b>Separation Anxiety</b>          | MASC SP C           | 0.84                           | 0.05        | 17.04          | <.001       | .63                          | .04        | 17.25          | <.001           |
|                                    | MASC SP P           | 0.84                           | 0.05        | 17.04          | <.001       | .58                          | .03        | 17.65          | <.001           |
| <b>Conduct Problems</b>            | YSR CD C            | 0.61                           | 0.10        | 5.90           | <.001       | .36                          | .05        | 7.44           | <.001           |
|                                    | CBCL CD P           | 0.61                           | 0.10        | 5.90           | <.001       | .36                          | .05        | 7.27           | <.001           |
| <b>Oppositional Defiant</b>        | YSR ODD C           | 0.50                           | 0.08        | 6.15           | <.001       | .33                          | .05        | 6.85           | <.001           |
|                                    | CBCL ODD P          | 0.50                           | 0.08        | 6.15           | <.001       | .31                          | .05        | 6.62           | <.001           |
| <b>Aggression</b>                  | EATQ AG C           | 0.55                           | 0.11        | 5.11           | <.001       | .31                          | .05        | 5.98           | <.001           |
|                                    | EATQ AG P           | 0.55                           | 0.11        | 5.11           | <.001       | .26                          | .05        | 5.89           | <.001           |
| <b>Parent Report Method Factor</b> | CDI P               | 1.00                           | 0.00        | -              | -           | .44                          | .04        | 10.79          | <.001           |
|                                    | MASC PH P           | 0.34                           | 0.09        | 3.64           | <.001       | .17                          | .05        | 3.26           | .001            |
|                                    | MASC SA P           | 0.59                           | 0.11        | 5.39           | <.001       | .24                          | .05        | 5.02           | <.001           |
|                                    | MASC SP P           | -0.15                          | 0.11        | -1.33          | .18         | -.07                         | .05        | -1.42          | .16             |
|                                    | CBCL CD P           | 2.58                           | 0.24        | 10.66          | <.001       | .76                          | .03        | 24.70          | <.001           |
|                                    | CBCL ODD P          | 1.98                           | 0.18        | 10.77          | <.001       | .72                          | .03        | 23.35          | <.001           |
|                                    | EATQ AG P           | 2.06                           | 0.20        | 10.17          | <.001       | .64                          | .03        | 18.72          | <.001           |
|                                    | SNAP Hyp. P         | 0.80                           | 0.11        | 7.60           | <.001       | .36                          | .05        | 7.75           | <.001           |
|                                    | SNAP Inatt. P       | 1.26                           | 0.15        | 8.51           | <.001       | .43                          | .04        | 9.80           | <.001           |
| <b>Child Report Method Factor</b>  | CDI C               | 1.00                           | 0.00        | -              | -           | .41                          | .04        | 11.40          | <.001           |
|                                    | MASC PH C           | 0.19                           | 0.10        | 1.87           | .06         | .09                          | .05        | 1.79           | .07             |
|                                    | MASC SA C           | -0.03                          | 0.11        | -0.22          | .82         | -.01                         | .05        | -0.22          | .82             |
|                                    | MASC SP C           | -0.57                          | 0.12        | -4.84          | <.001       | -.31                         | .05        | -6.27          | <.001           |
|                                    | YSR CD C            | 2.26                           | 0.22        | 10.16          | <.001       | .71                          | .03        | 22.08          | <.001           |
|                                    | YSR ODD C           | 1.21                           | 0.13        | 9.38           | <.001       | .50                          | .04        | 13.93          | <.001           |
|                                    | EATQ AG C           | 1.41                           | 0.15        | 9.46           | <.001       | .54                          | .03        | 15.80          | <.001           |
| <b>Predictor</b>                   | <b>Outcome</b>      | <b>Unstandardized Estimate</b> | <b>SE</b>   | <b>Est./SE</b> | <b>p</b>    | <b>Standardized Estimate</b> | <b>SE</b>  | <b>Est./SE</b> | <b>p</b>        |
| <b>Pubertal Timing</b>             | <b>Depression</b>   | <b>0.58</b>                    | <b>0.21</b> | <b>2.78</b>    | <b>.005</b> | <b>.51</b>                   | <b>.16</b> | <b>3.12</b>    | <b>.002</b>     |
|                                    | Physical Sx         | 0.30                           | 0.22        | 1.40           | .16         | .28                          | .19        | 1.45           | .15             |
|                                    | Social Anx          | 0.27                           | 0.18        | 1.50           | .13         | .25                          | .16        | 1.54           | .12             |
|                                    | <b>Separation</b>   | <b>-0.47</b>                   | <b>0.17</b> | <b>-2.72</b>   | <b>.007</b> | <b>-.42</b>                  | <b>.14</b> | <b>-2.93</b>   | <b>.003</b>     |
|                                    | <b>Conduct</b>      | <b>1.43</b>                    | <b>0.43</b> | <b>3.33</b>    | <b>.001</b> | <b>.95</b>                   | <b>.17</b> | <b>5.56</b>    | <b>&lt;.001</b> |
|                                    | <b>Oppositional</b> | <b>1.02</b>                    | <b>0.37</b> | <b>2.77</b>    | <b>.006</b> | <b>.80</b>                   | <b>.21</b> | <b>3.81</b>    | <b>&lt;.001</b> |
|                                    | <b>Aggression</b>   | <b>0.83</b>                    | <b>0.37</b> | <b>2.27</b>    | <b>.02</b>  | <b>.72</b>                   | <b>.25</b> | <b>2.92</b>    | <b>.003</b>     |
|                                    | SNAP Inatt. P       | 0.17                           | 0.18        | 0.95           | .35         | .08                          | .08        | 0.95           | .35             |
|                                    | SNAP Hyp. P         | 0.07                           | 0.15        | 0.46           | .65         | .04                          | .09        | 0.46           | .65             |
| <b>Gender</b>                      | <b>Depression</b>   | <b>0.34</b>                    | <b>0.16</b> | <b>2.09</b>    | <b>.04</b>  | <b>.15</b>                   | <b>.07</b> | <b>2.13</b>    | <b>.03</b>      |

0=male,1=female

## PUBERTAL TIMING TRANSDIAGNOSTIC

|                                      |                                |                   |             |                     |                 |                    |            |                     |                 |
|--------------------------------------|--------------------------------|-------------------|-------------|---------------------|-----------------|--------------------|------------|---------------------|-----------------|
|                                      | Physical Sx                    | <b>0.51</b>       | <b>0.17</b> | <b>3.01</b>         | <b>.003</b>     | <b>.24</b>         | <b>.07</b> | <b>3.18</b>         | <b>.001</b>     |
|                                      | <b>Social Anx</b>              | <b>0.77</b>       | <b>0.16</b> | <b>4.83</b>         | <b>&lt;.001</b> | <b>.35</b>         | <b>.07</b> | <b>5.47</b>         | <b>&lt;.001</b> |
|                                      | <b>Separation</b>              | <b>0.50</b>       | <b>0.13</b> | <b>3.98</b>         | <b>&lt;.001</b> | <b>.22</b>         | <b>.05</b> | <b>4.14</b>         | <b>&lt;.001</b> |
|                                      | Conduct                        | -0.18             | 0.25        | -0.71               | .48             | -.06               | .08        | -0.72               | .47             |
|                                      | Oppositional                   | 0.20              | 0.25        | 0.81                | .42             | .08                | .10        | 0.82                | .41             |
|                                      | Aggression                     | -0.13             | 0.25        | -0.54               | .59             | -.06               | .11        | -0.54               | .59             |
|                                      | <b>SNAP Inatt. P</b>           | <b>-0.59</b>      | <b>0.16</b> | <b>-3.56</b>        | <b>&lt;.001</b> | <b>-.13</b>        | <b>.04</b> | <b>-3.57</b>        | <b>&lt;.001</b> |
|                                      | SNAP Hyp. P                    | -0.16             | 0.12        | -1.32               | .19             | -.05               | .04        | -1.32               | .19             |
| <b>Timing x Gender</b>               | Depression                     | -0.15             | 0.27        | -0.56               | .57             | -.10               | .18        | -0.57               | .57             |
|                                      | Physical Sx                    | 0.05              | 0.29        | 0.18                | .86             | .04                | .20        | 0.18                | .86             |
|                                      | Social Anx                     | -0.27             | 0.24        | -1.14               | .26             | -.19               | .16        | -1.16               | .25             |
|                                      | Separation                     | 0.05              | 0.23        | 0.22                | .83             | .03                | .15        | 0.22                | .83             |
|                                      | Conduct                        | -0.60             | 0.48        | -1.27               | .21             | -.30               | .23        | -1.33               | .18             |
|                                      | Oppositional                   | -0.46             | 0.45        | -1.01               | .31             | -.27               | .26        | -1.04               | .30             |
|                                      | Aggression                     | -0.60             | 0.44        | -1.35               | .18             | -.39               | .27        | -1.45               | .15             |
|                                      | SNAP Inatt. P                  | -0.09             | 0.23        | -0.36               | .72             | -.03               | .08        | -0.36               | .72             |
|                                      | SNAP Hyp. P                    | -0.12             | 0.19        | -0.62               | .53             | -.06               | .09        | -0.62               | .53             |
| <b>Predictor</b>                     | <b>Factor</b>                  | <b>Covariance</b> | <b>SE</b>   | <b>Est./<br/>SE</b> | <b>p</b>        | <b>Correlation</b> | <b>SE</b>  | <b>Est./<br/>SE</b> | <b>p</b>        |
| <b>Pubertal<br/>Timing*</b>          | Parent Report<br>Method Factor | -0.19             | 0.06        | -3.22               | .001            | -.25               | .07        | -3.56               | <.001           |
|                                      | Child Report<br>Method Factor  | 0.07              | 0.06        | 1.19                | .23             | .08                | .07        | 1.20                | .23             |
| <b>Pubertal Timing<br/>x Gender*</b> | Parent Report<br>Method Factor | -0.11             | 0.04        | -2.64               | .01             | -.20               | .07        | -2.83               | .005            |
|                                      | Child Report<br>Method Factor  | 0.05              | 0.04        | 1.11                | .27             | .08                | .07        | 1.12                | .26             |

Note: C = Child self-report; P = Parent report; CDI = Children's Depression Inventory; MASC = Manifest Anxiety Scale for Children; SA = social anxiety; PH = physical symptoms; SP = separation/panic symptoms; CBCL/YSR = Child Behavior Checklist/Youth Self Report; ODD = oppositional defiant disorder symptoms; CD = conduct disorder symptoms; EATQ = Early Adolescent Temperament Questionnaire; AG = aggression; SNAP = Swanson, Nolan, and Pelham scale; Inatt. = inattention; Hyp. = hyperactivity. \* Sensitivity analyses showed that model parameters were not appreciably different when covariance between predictors and method factors was constrained to zero.

## PUBERTAL TIMING TRANSDIAGNOSTIC

| Factor                             | Indicator   | Unstandardized Loading | SE   | Est./SE | p     | Standardized Loading | SE    | Est./SE | p     |
|------------------------------------|-------------|------------------------|------|---------|-------|----------------------|-------|---------|-------|
| <b>Depression</b>                  | CDI C       | 0.40                   | 0.13 | 3.12    | .002  | .39                  | .03   | 11.85   | <.001 |
|                                    | CDI P       | 0.40                   | 0.13 | 3.12    | .002  | .42                  | .04   | 12.08   | <.001 |
| <b>Physical Symptoms</b>           | MASC PH C   | 0.71                   | 0.06 | 11.46   | <.001 | .40                  | .03   | 11.98   | <.001 |
|                                    | MASC PH P   | 0.71                   | 0.06 | 11.46   | <.001 | .46                  | .04   | 12.07   | <.001 |
| <b>Social Anxiety</b>              | MASC SA C   | 0.88                   | 0.07 | 13.41   | <.001 | .48                  | .03   | 14.53   | <.001 |
|                                    | MASC SA P   | 0.88                   | 0.07 | 13.41   | <.001 | .49                  | .03   | 14.68   | <.001 |
| <b>Separation Anxiety</b>          | MASC SP C   | 0.87                   | 0.05 | 17.07   | <.001 | .60                  | .03   | 18.31   | .001  |
|                                    | MASC SP P   | 0.87                   | 0.05 | 17.07   | <.001 | .55                  | .03   | 18.71   | .001  |
| <b>Conduct Problems</b>            | YSR CD C    | 0.63                   | 0.10 | 6.13    | <.001 | .25                  | .04   | 6.06    | <.001 |
|                                    | CBCL CD P   | 0.63                   | 0.10 | 6.13    | <.001 | .25                  | .04   | 6.03    | <.001 |
| <b>Oppositional Defiant</b>        | YSR ODD C   | 0.48                   | 0.09 | 5.57    | <.001 | .25                  | .04   | 5.56    | <.001 |
|                                    | CBCL ODD P  | 0.48                   | 0.09 | 5.57    | <.001 | .24                  | .04   | 5.50    | <.001 |
| <b>Aggression</b>                  | EATQ AG C   | 0.55                   | 0.11 | 5.22    | <.001 | .27                  | .05   | 5.21    | .001  |
|                                    | EATQ AG P   | 0.55                   | 0.11 | 5.22    | <.001 | .23                  | .04   | 5.21    | .001  |
| <b>Parent Report Method Factor</b> | CDI P       | 1.00                   | 0.00 | -       | -     | .39                  | .04   | 9.19    | <.001 |
|                                    | MASC PH P   | 0.41                   | 0.10 | 3.98    | <.001 | .19                  | .05   | 3.78    | <.001 |
|                                    | MASC SA P   | 0.55                   | 0.12 | 4.50    | <.001 | .21                  | .05   | 4.43    | <.001 |
|                                    | MASC SP P   | -0.23                  | 0.13 | -1.86   | .06   | -.10                 | .05   | -2.04   | .04   |
|                                    | CBCL CD P   | 2.69                   | 0.30 | 9.06    | <.001 | .74                  | .03   | 28.64   | <.001 |
|                                    | CBCL ODD P  | 2.05                   | 0.23 | 8.85    | <.001 | .70                  | .03   | 25.19   | <.001 |
|                                    | EATQ AG P   | 2.18                   | 0.26 | 8.51    | <.001 | .63                  | .03   | 19.54   | <.001 |
|                                    | SNAP Hyp. P | 0.84                   | 0.12 | 6.78    | <.001 | .35                  | .04   | 7.95    | <.001 |
| SNAP Inatt. P                      | 1.33        | 0.18                   | 7.33 | <.001   | .42   | .04                  | 10.11 | <.001   |       |
| <b>Child Report Method Factor</b>  | CDI C       | 1.00                   | 0.00 | -       | -     | .41                  | .04   | 9.83    | <.001 |
|                                    | MASC PH C   | 0.24                   | 0.10 | 2.31    | .02   | .10                  | .05   | 2.20    | .03   |
|                                    | MASC SA C   | 0.09                   | 0.11 | 0.85    | .40   | .04                  | .05   | 0.83    | .41   |
|                                    | MASC SP C   | -0.69                  | 0.14 | -4.99   | <.001 | -.36                 | .05   | -7.29   | <.001 |

Table S2. Syndrome based model (controlling for other syndromes) – Depression.

## PUBERTAL TIMING TRANSDIAGNOSTIC

|                                  | YSR CD C                    | 2.55                    | 0.27 | 9.41    | <.001 | .77                   | .03 | 27.15   | <.001 |
|----------------------------------|-----------------------------|-------------------------|------|---------|-------|-----------------------|-----|---------|-------|
|                                  | YSR ODD C                   | 1.42                    | 0.16 | 9.01    | <.001 | .56                   | .03 | 16.70   | <.001 |
|                                  | EATQ AG C                   | 1.53                    | 0.17 | 8.83    | <.001 | .56                   | .03 | 17.12   | <.001 |
| Predictor                        | Outcome                     | Unstandardized Estimate | SE   | Est./SE | p     | Standardized Estimate | SE  | Est./SE | p     |
| <b>Physical Sx</b>               | Depression                  | 0.88                    | 0.35 | 2.53    | .01   | .48                   | .09 | 5.18    | <.001 |
| <b>Social Anxiety Separation</b> | Depression                  | 0.73                    | 0.29 | 2.50    | .01   | .39                   | .09 | 4.41    | <.001 |
| <b>Conduct</b>                   | Depression                  | -0.62                   | 0.26 | -2.37   | .02   | -.34                  | .08 | -4.07   | <.001 |
| <b>Oppositional Aggression</b>   | Depression                  | 0.17                    | 0.28 | 0.62    | .54   | .09                   | .16 | 0.59    | .55   |
| <b>SNAP Inatt. P</b>             | Depression                  | -0.39                   | 0.38 | -1.04   | .30   | -.21                  | .17 | -1.28   | .20   |
| <b>SNAP Hyp. P</b>               | Depression                  | -0.43                   | 0.39 | -1.12   | .26   | -.23                  | .16 | -1.44   | .15   |
| <b>Pubertal Timing</b>           | Depression                  | 0.28                    | 0.10 | 2.74    | .006  | .32                   | .08 | 4.30    | <.001 |
| <b>Gender</b>                    | Depression                  | -0.09                   | 0.09 | -0.94   | .35   | -.08                  | .08 | -0.98   | .33   |
| <b>Timing x Gender</b>           | Depression                  | 0.12                    | 0.18 | 0.66    | .51   | .06                   | .10 | 0.66    | .51   |
|                                  | Depression                  | 0.41                    | 0.25 | 1.60    | .11   | .11                   | .06 | 1.79    | .07   |
|                                  | Depression                  | 0.11                    | 0.23 | 0.49    | .62   | .05                   | .09 | 0.50    | .62   |
| Predictor                        | Factor                      | Covariance              | SE   | Est./SE | p     | Correlation           | SE  | Est./SE | p     |
| <b>Pubertal Timing*</b>          | Parent Report Method Factor | 0.003                   | 0.04 | 0.08    | .94   | .004                  | .05 | 0.08    | .94   |
|                                  | Child Report Method Factor  | 0.28                    | 0.05 | 5.72    | <.001 | .37                   | .04 | 8.37    | <.001 |
| <b>Pubertal Timing x Gender*</b> | Parent Report Method Factor | -0.03                   | 0.03 | -1.01   | .31   | -.05                  | .05 | -1.03   | .30   |
|                                  | Child Report Method Factor  | 0.15                    | 0.03 | 4.46    | <.001 | .25                   | .05 | 5.41    | <.001 |

Note: C = Child self-report; P = Parent report; CDI = Children's Depression Inventory; MASC = Manifest Anxiety Scale for Children; SA = social anxiety; PH = physical symptoms; SP = separation/panic symptoms; CBCL/YSR = Child Behavior Checklist/Youth Self Report; ODD = oppositional defiant disorder symptoms; CD = conduct disorder symptoms; EATQ = Early Adolescent Temperament Questionnaire; AG = aggression; SNAP = Swanson, Nolan, and Pelham scale; Inatt. = inattention; Hyp. = hyperactivity. \* Sensitivity analyses showed that model parameters were not appreciably different when covariance between predictors and method factors was constrained to zero.

Table S3. Syndrome based model (controlling for other syndromes) – Physical Symptoms

|                                        |             |       |      |       |       |      |     |       |       |
|----------------------------------------|-------------|-------|------|-------|-------|------|-----|-------|-------|
| <b>Depression</b>                      | CDI C       | 0.75  | 0.06 | 12.74 | <.001 | .40  | .03 | 12.93 | <.001 |
|                                        | CDI P       | 0.75  | 0.06 | 12.74 | <.001 | .43  | .03 | 13.24 | <.001 |
| <b>Physical Symptoms<br/>(Anxiety)</b> | MASC PH C   | 0.46  | 0.11 | 4.40  | <.001 | .44  | .03 | 13.53 | <.001 |
|                                        | MASC PH P   | 0.46  | 0.11 | 4.40  | <.001 | .52  | .04 | 13.37 | <.001 |
| <b>Social Anxiety</b>                  | MASC SA C   | 0.89  | 0.07 | 13.53 | <.001 | .49  | .03 | 14.68 | <.001 |
|                                        | MASC SA P   | 0.89  | 0.07 | 13.53 | <.001 | .50  | .03 | 14.88 | <.001 |
| <b>Separation Anxiety</b>              | MASC SP C   | 0.94  | 0.05 | 18.70 | <.001 | .64  | .03 | 21.13 | .001  |
|                                        | MASC SP P   | 0.94  | 0.05 | 18.70 | <.001 | .59  | .03 | 21.03 | .001  |
| <b>Conduct Problems</b>                | YSR CD C    | 0.62  | 0.10 | 6.21  | <.001 | .24  | .04 | 6.15  | <.001 |
|                                        | CBCL CD P   | 0.62  | 0.10 | 6.21  | <.001 | .25  | .04 | 6.11  | <.001 |
| <b>Oppositional<br/>Defiant</b>        | YSR ODD C   | 0.47  | 0.09 | 5.38  | <.001 | .24  | .05 | 5.37  | <.001 |
|                                        | CBCL ODD P  | 0.47  | 0.09 | 5.38  | <.001 | .23  | .04 | 5.31  | <.001 |
| <b>Aggression</b>                      | EATQ AG C   | 0.58  | 0.10 | 5.78  | <.001 | .28  | .05 | 5.78  | <.001 |
|                                        | EATQ AG P   | 0.58  | 0.10 | 5.78  | <.001 | .24  | .04 | 5.78  | <.001 |
| <b>Parent Report<br/>Method Factor</b> | CDI P       | 1.00  | 0.00 | -     | -     | .46  | .04 | 12.15 | <.001 |
|                                        | MASC PH P   | 0.44  | 0.11 | 4.04  | <.001 | .23  | .06 | 3.86  | <.001 |
|                                        | MASC SA P   | 0.54  | 0.10 | 5.31  | <.001 | .24  | .05 | 4.99  | <.001 |
|                                        | MASC SP P   | -0.15 | 0.11 | -1.38 | .17   | -.07 | .05 | -1.47 | .14   |
|                                        | CBCL CD P   | 2.34  | 0.21 | 11.27 | <.001 | .76  | .03 | 30.45 | <.001 |
|                                        | CBCL ODD P  | 1.76  | 0.16 | 11.36 | <.001 | .71  | .03 | 25.39 | <.001 |
|                                        | EATQ AG P   | 1.89  | 0.18 | 10.61 | <.001 | .64  | .03 | 20.16 | <.001 |
|                                        | SNAP Hyp. P | 0.74  | 0.10 | 7.82  | <.001 | .37  | .05 | 8.15  | <.001 |

## PUBERTAL TIMING TRANSDIAGNOSTIC

|                                   |                             |                                |             |                |            |                                      |            |                |            |
|-----------------------------------|-----------------------------|--------------------------------|-------------|----------------|------------|--------------------------------------|------------|----------------|------------|
|                                   | SNAP Inatt. P               | 1.17                           | 0.13        | 8.78           | <.001      | .44                                  | .04        | 10.42          | <.001      |
| <b>Child Report Method Factor</b> | CDI C                       | 1.00                           | 0.00        | -              | -          | .46                                  | .04        | 12.81          | <.001      |
|                                   | MASC PH C                   | 0.26                           | 0.11        | 2.43           | .02        | .12                                  | .05        | 2.33           | .02        |
|                                   | MASC SA C                   | 0.15                           | 0.10        | 1.56           | .12        | .07                                  | .05        | 1.51           | .13        |
|                                   | MASC SP C                   | -0.55                          | 0.11        | -5.01          | <.001      | -.32                                 | .05        | -6.53          | <.001      |
|                                   | YSR CD C                    | 2.32                           | 0.20        | 11.58          | <.001      | .78                                  | .03        | 29.25          | <.001      |
|                                   | YSR ODD C                   | 1.28                           | 0.12        | 10.70          | <.001      | .57                                  | .03        | 17.43          | <.001      |
|                                   | EATQ AG C                   | 1.35                           | 0.13        | 10.42          | <.001      | .57                                  | .03        | 17.25          | <.001      |
| <b>Predictor</b>                  | <b>Outcome</b>              | <b>Unstandardized Estimate</b> | <b>SE</b>   | <b>Est./SE</b> | <b>p</b>   | <b>Standardized Estimate</b>         | <b>SE</b>  | <b>Est./SE</b> | <b>p</b>   |
| <b>Aggression</b>                 | Physical Sx                 | 0.31                           | 0.29        | 1.07           | .29        | .18                                  | .14        | 1.26           | .21        |
| <b>Social Anxiety Separation</b>  | Physical Sx                 | 0.36                           | 0.18        | 1.99           | .047       | .21                                  | .09        | 2.42           | .02        |
| <b>Depression</b>                 | Physical Sx                 | 0.69                           | 0.21        | 3.22           | .001       | .39                                  | .07        | 5.69           | <.001      |
| <b>Oppositional Conduct</b>       | Physical Sx                 | 1.00                           | 0.35        | 2.84           | .005       | .57                                  | .09        | 6.50           | <.001      |
| <b>SNAP Inatt. P</b>              | Physical Sx                 | 0.16                           | 0.29        | 0.56           | .57        | .09                                  | .15        | 0.61           | .55        |
| <b>SNAP Hyp. P</b>                | Physical Sx                 | -0.004                         | 0.29        | -0.01          | .99        | -.002                                | .16        | -0.01          | .99        |
| <b>Pubertal Timing</b>            | Physical Sx                 | -0.13                          | 0.06        | -2.04          | .04        | -.16                                 | .07        | -2.25          | .02        |
| <b>Gender</b>                     | Physical Sx                 | 0.13                           | 0.08        | 1.53           | .13        | .12                                  | .07        | 1.69           | .09        |
| <b>Timing x Gender</b>            | Physical Sx                 | <b>0.36</b>                    | <b>0.17</b> | <b>2.08</b>    | <b>.04</b> | <b>.20</b>                           | <b>.08</b> | <b>2.42</b>    | <b>.02</b> |
| <b>0=male,1=female</b>            | Physical Sx                 | 0.08                           | 0.19        | 0.40           | .69        | .02                                  | .06        | 0.40           | .69        |
| <b>Factor</b>                     | <b>Indicator</b>            | <b>Unstandardized Estimate</b> | <b>SE</b>   | <b>Est./SE</b> | <b>p</b>   | <b>Standardized Loading Estimate</b> | <b>SE</b>  | <b>Est./SE</b> | <b>p</b>   |
| <b>Predictor</b>                  | <b>Factor</b>               | <b>Covariance</b>              | <b>SE</b>   | <b>Est./SE</b> | <b>p</b>   | <b>Correlation</b>                   | <b>SE</b>  | <b>Est./SE</b> | <b>p</b>   |
| <b>Pubertal Timing*</b>           | Parent Report Method Factor | 0.04                           | 0.04        | 0.99           | .33        | .05                                  | .05        | 0.99           | .33        |
|                                   | Child Report Method Factor  | 0.33                           | 0.05        | 6.34           | <.001      | .39                                  | .04        | 9.01           | <.001      |
| <b>Pubertal Timing x Gender*</b>  | Parent Report Method Factor | -0.01                          | 0.03        | -0.23          | .82        | -.01                                 | .05        | -0.23          | .82        |
|                                   | Child Report Method Factor  | 0.18                           | 0.04        | 4.88           | <.001      | .27                                  | .05        | 5.83           | <.001      |

Note: C = Child self-report; P = Parent report; CDI = Children's Depression Inventory; MASC = Manifest Anxiety Scale for Children; SA = social anxiety; PH = physical symptoms; SP = separation/panic symptoms; CBCL/YSR = Child Behavior Checklist/Youth Self Report; ODD = oppositional defiant disorder symptoms; CD = conduct disorder symptoms; EATQ = Early Adolescent Temperament Questionnaire; AG = aggression; SNAP = Swanson, Nolan, and Pelham scale; Inatt. = inattention; Hyp. = hyperactivity. \* Sensitivity analyses showed that model parameters were not appreciably different when covariance between predictors and method factors was constrained to zero.

## PUBERTAL TIMING TRANSDIAGNOSTIC

48

|                                    |                |                                |             |                |            |                              |            |                |             |
|------------------------------------|----------------|--------------------------------|-------------|----------------|------------|------------------------------|------------|----------------|-------------|
| <b>Depression</b>                  | CDI C          | 0.74                           | 0.06        | 12.54          | <.001      | .39                          | .03        | 12.76          | <.001       |
|                                    | CDI P          | 0.74                           | 0.06        | 12.54          | <.001      | .43                          | .03        | 12.93          | <.001       |
| <b>Physical Symptoms (Anxiety)</b> | MASC PH C      | 0.70                           | 0.06        | 11.05          | <.001      | .39                          | .03        | 11.52          | <.001       |
|                                    | MASC PH P      | 0.70                           | 0.06        | 11.05          | <.001      | .46                          | .04        | 11.59          | <.001       |
| <b>Social Anxiety</b>              | MASC SA C      | 0.49                           | 0.32        | 1.53           | 0.13       | .50                          | .04        | 13.68          | <.001       |
|                                    | MASC SA P      | 0.49                           | 0.32        | 1.53           | 0.13       | .52                          | .04        | 13.28          | <.001       |
| <b>Separation Anxiety</b>          | MASC SP C      | 0.93                           | 0.05        | 18.57          | <.001      | .64                          | .03        | 21.06          | .001        |
|                                    | MASC SP P      | 0.93                           | 0.05        | 18.57          | <.001      | .58                          | .03        | 20.88          | .001        |
| <b>Conduct Problems</b>            | YSR CD C       | 0.59                           | 0.12        | 4.98           | <.001      | .23                          | .05        | 4.94           | <.001       |
|                                    | CBCL CD P      | 0.59                           | 0.12        | 4.98           | <.001      | .23                          | .05        | 4.89           | <.001       |
| <b>Oppositional Defiant</b>        | YSR ODD C      | 0.49                           | 0.08        | 5.95           | <.001      | .26                          | .04        | 5.96           | <.001       |
|                                    | CBCL ODD P     | 0.49                           | 0.08        | 5.95           | <.001      | .24                          | .04        | 5.88           | <.001       |
| <b>Aggression</b>                  | EATQ AG C      | 0.59                           | 0.10        | 5.93           | <.001      | .28                          | .05        | 5.93           | <.001       |
|                                    | EATQ AG P      | 0.59                           | 0.10        | 5.93           | <.001      | .24                          | .04        | 5.92           | <.001       |
| <b>Parent Report Method Factor</b> | CDI P          | 1.00                           | 0.00        | -              | -          | .45                          | .04        | 11.18          | <.001       |
|                                    | MASC PH P      | 0.38                           | 0.09        | 4.29           | <.001      | .20                          | .05        | 3.83           | <.001       |
|                                    | MASC SA P      | 0.78                           | 0.15        | 5.33           | <.001      | .34                          | .07        | 5.30           | <.001       |
|                                    | MASC SP P      | -0.15                          | 0.11        | -1.39          | .17        | -.08                         | .05        | -1.48          | .14         |
|                                    | CBCL CD P      | 2.43                           | 0.23        | 10.52          | <.001      | .75                          | .03        | 29.14          | <.001       |
|                                    | CBCL ODD P     | 1.84                           | 0.17        | 10.60          | <.001      | .70                          | .03        | 25.41          | <.001       |
|                                    | EATQ AG P      | 1.98                           | 0.20        | 10.04          | <.001      | .64                          | .03        | 20.12          | <.001       |
|                                    | SNAP Hyp. P    | 0.74                           | 0.10        | 7.56           | <.001      | .36                          | .05        | 7.74           | <.001       |
| SNAP Inatt. P                      | 1.21           | 0.14                           | 8.51        | <.001          | .44        | .04                          | 10.18      | <.001          |             |
| <b>Child Report Method Factor</b>  | CDI C          | 1.00                           | 0.00        | -              | -          | .46                          | .04        | 12.57          | <.001       |
|                                    | MASC PH C      | 0.29                           | 0.09        | 3.13           | .002       | .14                          | .05        | 2.96           | .003        |
|                                    | MASC SA C      | 0.27                           | 0.12        | 2.27           | .02        | .12                          | .06        | 2.20           | .03         |
|                                    | MASC SP C      | -0.55                          | 0.11        | -4.82          | <.001      | -.33                         | .05        | -6.25          | <.001       |
|                                    | YSR CD C       | 2.27                           | 0.20        | 11.34          | <.001      | .78                          | .03        | 27.71          | <.001       |
|                                    | YSR ODD C      | 1.25                           | 0.12        | 10.59          | <.001      | .56                          | .03        | 16.99          | <.001       |
|                                    | EATQ AG C      | 1.33                           | 0.13        | 10.33          | <.001      | .56                          | .03        | 16.93          | <.001       |
| <b>Predictor</b>                   | <b>Outcome</b> | <b>Unstandardized Estimate</b> | <b>SE</b>   | <b>Est./SE</b> | <b>p</b>   | <b>Standardized Estimate</b> | <b>SE</b>  | <b>Est./SE</b> | <b>p</b>    |
| <b>Aggression</b>                  | Social Anx     | -0.05                          | 0.34        | -0.15          | .88        | -.03                         | .17        | -0.16          | .87         |
| <b>Physical Sx</b>                 | Social Anx     | 0.36                           | 0.27        | 1.33           | .18        | .19                          | .09        | 2.06           | .04         |
| <b>Separation</b>                  | Social Anx     | 0.70                           | 0.50        | 1.40           | .16        | .37                          | .07        | 5.01           | <.001       |
| <b>Depression</b>                  | Social Anx     | 0.74                           | 0.45        | 1.65           | .10        | .39                          | .10        | 4.08           | <.001       |
| <b>Oppositional</b>                | Social Anx     | -0.41                          | 0.60        | -0.69          | .49        | -.22                         | .20        | -1.08          | .28         |
| <b>Conduct</b>                     | Social Anx     | -0.86                          | 1.04        | -0.83          | .41        | -.45                         | .28        | -1.63          | .10         |
| <b>SNAP Inatt. P</b>               | Social Anx     | 0.11                           | 0.09        | 1.25           | .21        | .12                          | .07        | 1.77           | .08         |
| <b>SNAP Hyp. P</b>                 | Social Anx     | -0.42                          | 0.30        | -1.39          | .17        | -.36                         | .07        | -4.94          | <.001       |
| <b>Pubertal Timing</b>             | Social Anx     | 0.24                           | 0.22        | 1.11           | .27        | .13                          | .09        | 1.47           | .14         |
| <b>Gender</b>                      | Social Anx     | <b>0.74</b>                    | <b>0.54</b> | <b>1.37</b>    | <b>.17</b> | <b>.19</b>                   | <b>.06</b> | <b>3.35</b>    | <b>.001</b> |
| 0=male,1=female                    |                |                                |             |                |            |                              |            |                |             |
| <b>Timing x Gender</b>             | Social Anx     | -0.37                          | 0.32        | -1.18          | .24        | -.15                         | .08        | 1.25           | .08         |

Table S4. Syndrome based model (controlling for other syndromes) – Social Anxiety.

| Predictor | Factor | Covariance | SE | Est./SE | p | Correlation | SE | Est./SE | p |
|-----------|--------|------------|----|---------|---|-------------|----|---------|---|
|-----------|--------|------------|----|---------|---|-------------|----|---------|---|

## PUBERTAL TIMING TRANSDIAGNOSTIC

|                                      |                  |       |      |       |       |      |     |       |       |
|--------------------------------------|------------------|-------|------|-------|-------|------|-----|-------|-------|
| <b>Pubertal Timing*</b>              | Parent Report    | 0.003 | 0.04 | 0.07  | .94   | .004 | .05 | 0.07  | .94   |
|                                      | Method<br>Factor |       |      |       |       |      |     |       |       |
| <b>Pubertal Timing x<br/>Gender*</b> | Child Report     | 0.33  | 0.05 | 6.15  | <.001 | .38  | .04 | 8.64  | <.001 |
|                                      | Method<br>Factor |       |      |       |       |      |     |       |       |
| <b>Pubertal Timing x<br/>Gender*</b> | Parent Report    | -0.04 | 0.03 | -1.14 | .26   | -.06 | .05 | -1.15 | .25   |
|                                      | Method<br>Factor |       |      |       |       |      |     |       |       |
| <b>Pubertal Timing x<br/>Gender*</b> | Child Report     | 0.17  | 0.04 | 4.64  | <.001 | .26  | .05 | 5.48  | <.001 |
|                                      | Method<br>Factor |       |      |       |       |      |     |       |       |

*Note:* C = Child self-report; P = Parent report; CDI = Children's Depression Inventory; MASC = Manifest Anxiety Scale for Children; SA = social anxiety; PH = physical symptoms; SP = separation/panic symptoms; CBCL/YSR = Child Behavior Checklist/Youth Self Report; ODD = oppositional defiant disorder symptoms; CD = conduct disorder symptoms; EATQ = Early Adolescent Temperament Questionnaire; AG = aggression; SNAP = Swanson, Nolan, and Pelham scale; Inatt. = inattention; Hyp. = hyperactivity. \*Sensitivity analyses showed that model parameters were not appreciably different when covariance between predictors and method factors was constrained to zero.



## PUBERTAL TIMING TRANSDIAGNOSTIC

| Factor                                    | Indicator         | Unstandardized Loading         | SE          | Est./SE        | p               | Standardized Loading                 | SE         | Est./SE        | p               |
|-------------------------------------------|-------------------|--------------------------------|-------------|----------------|-----------------|--------------------------------------|------------|----------------|-----------------|
| <b>Depression</b>                         | CDI C             | 0.68                           | 0.06        | 11.22          | <.001           | .36                                  | .03        | 11.44          | <.001           |
|                                           | CDI P             | 0.68                           | 0.06        | 11.22          | <.001           | .40                                  | .04        | 11.58          | <.001           |
| <b>Physical Symptoms (Anxiety)</b>        | MASC PH C         | 0.70                           | 0.06        | 11.06          | <.001           | .39                                  | .03        | 11.62          | <.001           |
|                                           | MASC PH P         | 0.70                           | 0.06        | 11.06          | <.001           | .46                                  | .04        | 11.60          | <.001           |
| <b>Social Anxiety</b>                     | MASC SA C         | 0.90                           | 0.07        | 13.52          | <.001           | .48                                  | .03        | 15.01          | <.001           |
|                                           | MASC SA P         | 0.90                           | 0.07        | 13.52          | <.001           | .50                                  | .03        | 14.80          | <.001           |
| <b>Separation Anxiety</b>                 | MASC SP C         | 0.62                           | 0.11        | 5.60           | <.001           | .65                                  | .03        | 20.83          | .001            |
|                                           | MASC SP P         | 0.62                           | 0.11        | 5.60           | <.001           | .59                                  | .03        | 21.43          | .001            |
| <b>Conduct Problems</b>                   | YSR CD C          | 0.63                           | 0.10        | 6.11           | <.001           | .25                                  | .04        | 6.03           | <.001           |
|                                           | CBCL CD P         | 0.63                           | 0.10        | 6.11           | <.001           | .25                                  | .04        | 6.00           | <.001           |
| <b>Oppositional Defiant</b>               | YSR ODD C         | 0.51                           | 0.08        | 6.32           | <.001           | .26                                  | .04        | 6.32           | <.001           |
|                                           | CBCL ODD P        | 0.51                           | 0.08        | 6.32           | <.001           | .25                                  | .04        | 6.25           | <.001           |
| <b>Aggression</b>                         | EATQ AG C         | 0.57                           | 0.10        | 5.59           | <.001           | .28                                  | .05        | 5.57           | <.001           |
|                                           | EATQ AG P         | 0.57                           | 0.10        | 5.59           | <.001           | .24                                  | .04        | 5.58           | <.001           |
| <b>Parent Report Method Factor</b>        | CDI P             | 1.00                           | 0.00        | -              | -               | .42                                  | .04        | 10.78          | <.001           |
|                                           | MASC PH P         | 0.37                           | 0.10        | 3.73           | <.001           | .17                                  | .05        | 3.37           | .001            |
|                                           | MASC SA P         | 0.57                           | 0.12        | 4.98           | <.001           | .23                                  | .05        | 4.65           | <.001           |
|                                           | MASC SP P         | -0.05                          | 0.12        | -0.43          | .67             | -.02                                 | .05        | -0.43          | .67             |
|                                           | CBCL CD P         | 2.59                           | 0.25        | 10.50          | <.001           | .74                                  | .03        | 26.95          | <.001           |
|                                           | CBCL ODD P        | 2.01                           | 0.19        | 10.44          | <.001           | .70                                  | .03        | 25.16          | <.001           |
|                                           | EATQ AG P         | 2.14                           | 0.22        | 9.89           | <.001           | .63                                  | .03        | 19.41          | <.001           |
|                                           | SNAP Hyp. P       | 0.82                           | 0.11        | 7.27           | <.001           | .35                                  | .05        | 7.68           | <.001           |
| SNAP Inatt. P                             | 1.26              | 0.16                           | 8.03        | <.001          | .42             | .04                                  | 9.35       | <.001          |                 |
| <b>Child Report Method Factor</b>         | CDI C             | 1.00                           | 0.00        | -              | -               | .44                                  | .04        | 11.37          | <.001           |
|                                           | MASC PH C         | 0.29                           | 0.10        | 2.85           | .004            | .13                                  | .05        | 2.65           | .008            |
|                                           | MASC SA C         | 0.12                           | 0.11        | 1.06           | .29             | .05                                  | .05        | 1.03           | .31             |
|                                           | MASC SP C         | -0.38                          | 0.11        | -3.37          | .001            | -.21                                 | .05        | -3.93          | <.001           |
|                                           | YSR CD C          | 2.53                           | 0.25        | 10.10          | <.001           | .81                                  | .03        | 27.03          | <.001           |
|                                           | YSR ODD C         | 1.26                           | 0.13        | 9.75           | <.001           | .53                                  | .04        | 14.55          | <.001           |
|                                           | EATQ AG C         | 1.40                           | 0.15        | 9.65           | <.001           | .55                                  | .04        | 15.58          | <.001           |
| <b>Predictor</b>                          | <b>Outcome</b>    | <b>Unstandardized Estimate</b> | <b>SE</b>   | <b>Est./SE</b> | <b>p</b>        | <b>Standardized Loading Estimate</b> | <b>SE</b>  | <b>Est./SE</b> | <b>p</b>        |
| <b>Aggression</b>                         | Separation        | -0.27                          | 0.23        | -1.21          | .23             | -.17                                 | .12        | -1.40          | .16             |
| <b>Physical Sx</b>                        | Separation        | 0.42                           | 0.14        | 2.96           | .003            | .27                                  | .08        | 3.40           | .001            |
| <b>Social Anxiety</b>                     | Separation        | 0.39                           | 0.13        | 3.01           | .003            | .25                                  | .07        | 3.37           | .001            |
| <b>Depression</b>                         | Separation        | -0.69                          | 0.24        | -2.88          | .004            | -.44                                 | .09        | -4.88          | <.001           |
| <b>Oppositional Conduct</b>               | Separation        | -0.38                          | 0.24        | -1.55          | .12             | -.24                                 | .12        | -1.93          | .05             |
| <b>SNAP Inatt. P</b>                      | Separation        | -0.13                          | 0.22        | -0.61          | .54             | -.08                                 | .13        | -0.65          | .52             |
| <b>SNAP Hyp. P</b>                        | Separation        | -0.11                          | 0.05        | -2.17          | .03             | -.15                                 | .06        | -2.37          | .02             |
| <b>SNAP Hyp. P</b>                        | Separation        | 0.12                           | 0.06        | 1.89           | .06             | .12                                  | .06        | 1.94           | .05             |
| <b>Pubertal Timing</b>                    | <b>Separation</b> | <b>-0.63</b>                   | <b>0.17</b> | <b>-3.73</b>   | <b>&lt;.001</b> | <b>-.40</b>                          | <b>.08</b> | <b>-5.06</b>   | <b>&lt;.001</b> |
| <b>Gender</b>                             | Separation        | 0.29                           | 0.16        | 1.74           | .08             | .09                                  | .05        | 1.85           | .06             |
| 0=male,1=female<br><b>Timing x Gender</b> | Separation        | 0.08                           | 0.17        | 0.50           | .62             | .04                                  | .08        | 0.50           | .62             |

Table S5. Syndrome based model (controlling for other syndromes) – Separation Anxiety.

| Predictor | Factor | Covariance | SE | Est./SE | p | Correlation | SE | Est./SE | p |
|-----------|--------|------------|----|---------|---|-------------|----|---------|---|
|-----------|--------|------------|----|---------|---|-------------|----|---------|---|

## PUBERTAL TIMING TRANSDIAGNOSTIC

|                                  |               |       |      |       |       |      |     |       |       |
|----------------------------------|---------------|-------|------|-------|-------|------|-----|-------|-------|
| <b>Pubertal Timing*</b>          | Parent Report | -0.05 | 0.04 | -1.27 | .20   | -.07 | .05 | -1.28 | .20   |
|                                  | Method Factor |       |      |       |       |      |     |       |       |
| <b>Pubertal Timing x Gender*</b> | Child Report  | 0.24  | 0.05 | 4.76  | <.001 | .29  | .05 | 6.13  | <.001 |
|                                  | Method Factor |       |      |       |       |      |     |       |       |
| <b>Pubertal Timing x Gender*</b> | Parent Report | -0.06 | 0.03 | -1.94 | .05   | -.11 | .05 | -1.99 | .05   |
|                                  | Method Factor |       |      |       |       |      |     |       |       |
| <b>Pubertal Timing x Gender*</b> | Child Report  | 0.12  | 0.04 | 3.40  | .001  | .19  | .05 | 3.82  | <.001 |
|                                  | Method Factor |       |      |       |       |      |     |       |       |

*Note:* C = Child self-report; P = Parent report; CDI = Children's Depression Inventory; MASC = Manifest Anxiety Scale for Children; SA = social anxiety; PH = physical symptoms; SP = separation/panic symptoms; CBCL/YSR = Child Behavior Checklist/Youth Self Report; ODD = oppositional defiant disorder symptoms; CD = conduct disorder symptoms; EATQ = Early Adolescent Temperament Questionnaire; AG = aggression; SNAP = Swanson, Nolan, and Pelham scale; Inatt. = inattention; Hyp. = hyperactivity. \*Sensitivity analyses showed that model parameters were not appreciably different when covariance between predictors and method factors was constrained to zero.

## PUBERTAL TIMING TRANSDIAGNOSTIC

52

Table S6. Syndrome based model (controlling for other syndromes) – Conduct Disorder.

| Factor                             | Indicator      | Unstandardized Loading  | SE          | Est./SE     | p          | Standardized Loading          | SE         | Est./SE     | p          |
|------------------------------------|----------------|-------------------------|-------------|-------------|------------|-------------------------------|------------|-------------|------------|
| <b>Depression</b>                  | CDI C          | 0.69                    | 0.07        | 10.62       | <.001      | .36                           | .03        | 10.66       | <.001      |
|                                    | CDI P          | 0.69                    | 0.07        | 10.62       | <.001      | .40                           | .04        | 10.67       | <.001      |
| <b>Physical Symptoms (Anxiety)</b> | MASC PH C      | 0.65                    | 0.07        | 9.94        | <.001      | .36                           | .04        | 10.33       | <.001      |
|                                    | MASC PH P      | 0.65                    | 0.07        | 9.94        | <.001      | .43                           | .04        | 10.21       | <.001      |
| <b>Social Anxiety</b>              | MASC SA C      | 0.83                    | 0.07        | 12.66       | <.001      | .45                           | .03        | 13.64       | <.001      |
|                                    | MASC SA P      | 0.83                    | 0.07        | 12.66       | <.001      | .46                           | .03        | 13.61       | <.001      |
| <b>Separation Anxiety</b>          | MASC SP C      | 0.89                    | 0.05        | 17.49       | <.001      | .61                           | .03        | 19.65       | .001       |
|                                    | MASC SP P      | 0.89                    | 0.05        | 17.49       | <.001      | .56                           | .03        | 19.01       | .001       |
| <b>Conduct Problems</b>            | YSR CD C       | 0.49                    | 0.15        | 3.29        | .001       | .39                           | .03        | 11.42       | <.001      |
|                                    | CBCL CD P      | 0.49                    | 0.15        | 3.29        | .001       | .40                           | .04        | 11.04       | <.001      |
| <b>Oppositional Defiant</b>        | YSR ODD C      | 0.65                    | 0.08        | 8.31        | <.001      | .33                           | .04        | 8.48        | <.001      |
|                                    | CBCL ODD P     | 0.65                    | 0.08        | 8.31        | <.001      | .32                           | .04        | 8.10        | <.001      |
| <b>Aggression</b>                  | EATQ AG C      | 0.72                    | 0.09        | 7.81        | <.001      | .34                           | .04        | 7.90        | <.001      |
|                                    | EATQ AG P      | 0.72                    | 0.09        | 7.81        | <.001      | .30                           | .04        | 7.76        | <.001      |
| <b>Parent Report Method Factor</b> | CDI P          | 1.00                    | 0.00        | -           | -          | .46                           | .04        | 10.66       | <.001      |
|                                    | MASC PH P      | 0.46                    | 0.10        | 4.18        | <.001      | .21                           | .06        | 3.72        | <.001      |
|                                    | MASC SA P      | 0.58                    | 0.11        | 5.24        | <.001      | .25                           | .05        | 4.96        | <.001      |
|                                    | MASC SP P      | -0.18                   | 0.12        | -1.49       | .14        | -.09                          | .06        | -1.59       | .11        |
|                                    | CBCL CD P      | 2.05                    | 0.22        | 9.37        | <.001      | .65                           | .04        | 15.14       | <.001      |
|                                    | CBCL ODD P     | 1.69                    | 0.18        | 9.41        | <.001      | .65                           | .04        | 18.75       | <.001      |
|                                    | EATQ AG P      | 1.91                    | 0.21        | 9.12        | <.001      | .62                           | .04        | 17.31       | <.001      |
|                                    | SNAP Hyp. P    | 0.85                    | 0.11        | 7.80        | <.001      | .40                           | .05        | 8.73        | <.001      |
| SNAP Inatt. P                      | 1.36           | 0.16                    | 8.53        | <.001       | .48        | .04                           | 10.99      | <.001       |            |
| <b>Child Report Method Factor</b>  | CDI C          | 1.00                    | 0.00        | -           | -          | .46                           | .04        | 10.82       | <.001      |
|                                    | MASC PH C      | 0.27                    | 0.10        | 2.80        | .005       | .13                           | .05        | 2.59        | .01        |
|                                    | MASC SA C      | 0.17                    | 0.10        | 1.67        | .10        | .08                           | .05        | 1.59        | .11        |
|                                    | MASC SP C      | -0.68                   | 0.12        | -5.53       | <.001      | -.41                          | .04        | -9.72       | <.001      |
|                                    | YSR CD C       | 1.91                    | 0.19        | 9.99        | <.001      | .65                           | .04        | 18.78       | <.001      |
|                                    | YSR ODD C      | 1.21                    | 0.13        | 9.12        | <.001      | .53                           | .04        | 14.94       | <.001      |
|                                    | EATQ AG C      | 1.25                    | 0.14        | 8.80        | <.001      | .52                           | .04        | 14.28       | <.001      |
| Predictor                          | Outcome        | Unstandardized Estimate | SE          | Est./SE     | p          | Standardized Loading Estimate | SE         | Est./SE     | p          |
| <b>Physical</b>                    | Conduct        | -0.04                   | 0.19        | -0.22       | .83        | -.02                          | .10        | -0.22       | .83        |
| <b>Social Anxiety</b>              | Conduct        | -0.26                   | 0.19        | -1.36       | .18        | -.13                          | .09        | -1.41       | .16        |
| <b>Separation</b>                  | Conduct        | 0.10                    | 0.17        | 0.58        | .57        | .05                           | .08        | 0.60        | .55        |
| <b>Depression</b>                  | Conduct        | 0.52                    | 0.29        | 1.77        | .08        | .26                           | .09        | 2.74        | .006       |
| <b>Oppositional</b>                | Conduct        | 1.19                    | 0.52        | 2.31        | .02        | .59                           | .10        | 6.04        | <.001      |
| <b>Aggression</b>                  | Conduct        | 1.11                    | 0.49        | 2.25        | .02        | .55                           | .10        | 5.54        | <.001      |
| <b>SNAP Inatt. P</b>               | Conduct        | 0.07                    | 0.07        | 0.98        | .33        | .08                           | .07        | 1.02        | .31        |
| <b>SNAP Hyp. P</b>                 | Conduct        | -0.09                   | 0.10        | -0.99       | .32        | -.08                          | .08        | -1.02       | .31        |
| <b>Pubertal Timing</b>             | <b>Conduct</b> | <b>0.37</b>             | <b>0.21</b> | <b>1.75</b> | <b>.08</b> | <b>.18</b>                    | <b>.09</b> | <b>2.05</b> | <b>.04</b> |
| <b>Gender</b>                      | Conduct        | -0.17                   | 0.24        | -0.71       | .48        | -.04                          | .06        | -0.74       | .46        |
| 0=male,1=female                    |                |                         |             |             |            |                               |            |             |            |
| <b>Timing x Gender</b>             | Conduct        | -0.16                   | 0.24        | -0.67       | .50        | -.06                          | .09        | -0.69       | .49        |

52

## PUBERTAL TIMING TRANSDIAGNOSTIC

| Predictor                            | Factor                            | Covariance | SE   | Est./<br>SE | <i>p</i> | Correlation | SE  | Est./<br>SE | <i>p</i> |
|--------------------------------------|-----------------------------------|------------|------|-------------|----------|-------------|-----|-------------|----------|
| <b>Pubertal Timing*</b>              | Parent Report<br>Method<br>Factor | 0.01       | 0.05 | 0.22        | .83      | .01         | .06 | .22         | .82      |
|                                      | Child Report<br>Method<br>Factor  | 0.32       | 0.06 | 5.61        | <.001    | .36         | .05 | 7.99        | <.001    |
| <b>Pubertal Timing x<br/>Gender*</b> | Parent Report<br>Method<br>Factor | -0.03      | 0.03 | -0.93       | .35      | -.05        | .06 | -0.93       | .35      |
|                                      | Child Report<br>Method<br>Factor  | 0.17       | 0.04 | 4.41        | <.001    | .26         | .05 | 5.34        | <.001    |

*Note:* C = Child self-report; P = Parent report; CDI = Children's Depression Inventory; MASC = Manifest Anxiety Scale for Children; SA = social anxiety; PH = physical symptoms; SP = separation/panic symptoms; CBCL/YSR = Child Behavior Checklist/Youth Self Report; ODD = oppositional defiant disorder symptoms; CD = conduct disorder symptoms; EATQ = Early Adolescent Temperament Questionnaire; AG = aggression; SNAP = Swanson, Nolan, and Pelham scale; Inatt. = inattention; Hyp. = hyperactivity. \*Sensitivity analyses showed that model parameters were not appreciably different when covariance between predictors and method factors was constrained to zero.

## PUBERTAL TIMING TRANSDIAGNOSTIC

Table S7. Syndrome based model (controlling for other syndromes) – ODD.

| Factor                             | Indicator      | Unstandardized Loading         | SE        | Est./SE        | p        | Standardized Loading         | SE        | Est./SE        | p        |
|------------------------------------|----------------|--------------------------------|-----------|----------------|----------|------------------------------|-----------|----------------|----------|
| <b>Depression</b>                  | CDI C          | 0.67                           | 0.06      | 10.32          | <.001    | .35                          | .03       | 10.38          | <.001    |
|                                    | CDI P          | 0.67                           | 0.06      | 10.32          | <.001    | .39                          | .04       | 10.47          | <.001    |
| <b>Physical Symptoms (Anxiety)</b> | MASC PH C      | 0.64                           | 0.07      | 9.78           | <.001    | .36                          | .03       | 10.10          | <.001    |
|                                    | MASC PH P      | 0.64                           | 0.07      | 9.78           | <.001    | .43                          | .04       | 10.05          | <.001    |
| <b>Social Anxiety</b>              | MASC SA C      | 0.83                           | 0.07      | 12.46          | <.001    | .45                          | .03       | 13.32          | <.001    |
|                                    | MASC SA P      | 0.83                           | 0.07      | 12.46          | <.001    | .47                          | .04       | 13.38          | <.001    |
| <b>Separation Anxiety</b>          | MASC SP C      | 0.89                           | 0.05      | 17.97          | <.001    | .62                          | .03       | 19.71          | .001     |
|                                    | MASC SP P      | 0.89                           | 0.05      | 17.97          | <.001    | .56                          | .03       | 19.94          | .001     |
| <b>Conduct Problems</b>            | YSR CD C       | 0.79                           | 0.10      | 8.10           | <.001    | .31                          | .04       | 8.11           | <.001    |
|                                    | CBCL CD P      | 0.79                           | 0.10      | 8.10           | <.001    | .32                          | .04       | 7.87           | <.001    |
| <b>Oppositional Defiant</b>        | YSR ODD C      | 0.39                           | 0.11      | 3.71           | <.001    | .34                          | .04       | 8.11           | <.001    |
|                                    | CBCL ODD P     | 0.39                           | 0.11      | 3.71           | <.001    | .33                          | .04       | 7.85           | <.001    |
| <b>Aggression</b>                  | EATQ AG C      | 0.64                           | 0.10      | 6.53           | <.001    | .31                          | .05       | 6.54           | .001     |
|                                    | EATQ AG P      | 0.64                           | 0.10      | 6.53           | <.001    | .27                          | .04       | 6.51           | .001     |
| <b>Parent Report Method Factor</b> | CDI P          | 1.00                           | 0.00      | -              | -        | .45                          | .04       | 11.87          | <.001    |
|                                    | MASC PH P      | 0.36                           | 0.09      | 3.94           | <.001    | .19                          | .05       | 3.58           | <.001    |
|                                    | MASC SA P      | 0.51                           | 0.11      | 4.73           | <.001    | .22                          | .05       | 4.46           | <.001    |
|                                    | MASC SP P      | -0.25                          | 0.12      | -2.05          | .04      | -.12                         | .05       | -2.25          | .03      |
|                                    | CBCL CD P      | 2.26                           | 0.21      | 10.62          | <.001    | .71                          | .03       | 22.00          | <.001    |
|                                    | CBCL ODD P     | 1.51                           | 0.16      | 9.40           | <.001    | .58                          | .05       | 12.69          | <.001    |
|                                    | EATQ AG P      | 1.91                           | 0.19      | 9.96           | <.001    | .61                          | .04       | 17.63          | <.001    |
|                                    | SNAP Hyp. P    | 0.79                           | 0.11      | 7.53           | <.001    | .37                          | .05       | 8.15           | <.001    |
|                                    | SNAP Inatt. P  | 1.29                           | 0.15      | 8.57           | <.001    | .46                          | .04       | 10.59          | <.001    |
| <b>Child Report Method Factor</b>  | CDI C          | 1.00                           | 0.00      | -              | -        | .48                          | .04       | 13.25          | <.001    |
|                                    | MASC PH C      | 0.27                           | 0.09      | 3.19           | .001     | .14                          | .05       | 3.02           | .003     |
|                                    | MASC SA C      | 0.15                           | 0.09      | 1.59           | .11      | .07                          | .05       | 1.54           | .13      |
|                                    | MASC SP C      | -0.54                          | 0.11      | -5.16          | <.001    | -.34                         | .05       | -6.40          | <.001    |
|                                    | YSR CD C       | 2.12                           | 0.19      | 10.98          | <.001    | .75                          | .03       | 23.92          | <.001    |
|                                    | YSR ODD C      | 1.04                           | 0.11      | 9.26           | <.001    | .49                          | .04       | 12.06          | <.001    |
|                                    | EATQ AG C      | 1.26                           | 0.12      | 10.19          | <.001    | .55                          | .03       | 16.27          | <.001    |
| <b>Predictor</b>                   | <b>Outcome</b> | <b>Unstandardized Estimate</b> | <b>SE</b> | <b>Est./SE</b> | <b>p</b> | <b>Standardized Estimate</b> | <b>SE</b> | <b>Est./SE</b> | <b>p</b> |
| <b>Physical Sx</b>                 | Oppositional   | -0.15                          | 0.21      | -0.73          | .47      | -.09                         | .12       | -0.74          | .46      |
| <b>Social Anxiety</b>              | Oppositional   | -0.20                          | 0.20      | -1.03          | .30      | -.12                         | .11       | -1.06          | .29      |
| <b>Separation</b>                  | Oppositional   | -0.35                          | 0.20      | -1.74          | .08      | -.21                         | .10       | -2.18          | .03      |
| <b>Depression</b>                  | Oppositional   | -0.14                          | 0.23      | -0.60          | .55      | -.08                         | .14       | -0.59          | .56      |
| <b>Conduct</b>                     | Oppositional   | 1.05                           | 0.45      | 2.36           | .02      | .62                          | .12       | 5.17           | <.001    |
| <b>Aggression</b>                  | Oppositional   | 0.70                           | 0.37      | 1.90           | .06      | .41                          | .14       | 2.95           | .003     |
| <b>SNAP Inatt. P</b>               | Oppositional   | 0.04                           | 0.07      | 0.62           | .54      | .06                          | .09       | 0.64           | .52      |
| <b>SNAP Hyp. P</b>                 | Oppositional   | 0.08                           | 0.10      | 0.84           | .40      | .08                          | .09       | 0.88           | .38      |
| <b>Pubertal Timing</b>             | Oppositional   | 0.11                           | 0.19      | 0.57           | .57      | .06                          | .11       | 0.58           | .56      |
| <b>Gender</b>                      | Oppositional   | 0.38                           | 0.26      | 1.45           | .15      | .11                          | .07       | 1.58           | .11      |

## PUBERTAL TIMING TRANSDIAGNOSTIC

| 0=male,1=female                 |                             |              |       |         |       |             |       |         |       |     |
|---------------------------------|-----------------------------|--------------|-------|---------|-------|-------------|-------|---------|-------|-----|
| Timing x Gender                 |                             | Oppositional | -0.02 | 0.23    | -0.10 | .92         | -0.01 | .10     | -0.10 | .92 |
| Predictor                       | Factor                      | Covariance   | SE    | Est./SE | p     | Correlation | SE    | Est./SE | p     |     |
| <b>Pubertal Timing</b>          | Parent Report Method Factor | 0.02         | 0.04  | 0.49    | .63   | .03         | .05   | 0.49    | .63   |     |
|                                 | Child Report Method Factor  | 0.34         | 0.06  | 6.15    | <.001 | .37         | .04   | 8.50    | <.001 |     |
| <b>Pubertal Timing x Gender</b> | Parent Report Method Factor | -0.03        | 0.03  | -0.81   | .42   | -.04        | .06   | -.81    | .42   |     |
|                                 | Child Report Method Factor  | 0.18         | 0.04  | 4.65    | <.001 | .26         | .05   | 5.49    | <.001 |     |

Note: C = Child self-report; P = Parent report; CDI = Children's Depression Inventory; MASC = Manifest Anxiety Scale for Children; SA = social anxiety; PH = physical symptoms; SP = separation/panic symptoms; CBCL/YSR = Child Behavior Checklist/Youth Self Report; ODD = oppositional defiant disorder symptoms; CD = conduct disorder symptoms; EATQ = Early Adolescent Temperament Questionnaire; AG = aggression; SNAP = Swanson, Nolan, and Pelham scale; Inatt. = inattention; Hyp. = hyperactivity. \*Sensitivity analyses showed that model parameters were not appreciably different when covariance between predictors and method factors was constrained to zero.

## PUBERTAL TIMING TRANSDIAGNOSTIC

56

| Factor     | Indicator | Unstandardized Loading | SE   | Est./ SE | <i>p</i> | Standardized Loading | SE  | Est./ SE | <i>p</i> |
|------------|-----------|------------------------|------|----------|----------|----------------------|-----|----------|----------|
| Depression | CDI C     | 0.67                   | 0.06 | 10.61    | <.001    | .35                  | .03 | 10.65    | <.001    |

Table S8. Syndrome based model (controlling for other syndromes) – Aggression.

## PUBERTAL TIMING TRANSDIAGNOSTIC

|                                    |                |                                |           |                |          |                              |           |                |          |
|------------------------------------|----------------|--------------------------------|-----------|----------------|----------|------------------------------|-----------|----------------|----------|
|                                    | CDI P          | 0.67                           | 0.06      | 10.61          | <.001    | .39                          | .04       | 10.76          | <.001    |
| <b>Physical Symptoms (Anxiety)</b> | MASC PH C      | 0.65                           | 0.07      | 10.03          | <.001    | .37                          | .04       | 10.38          | <.001    |
|                                    | MASC PH P      | 0.65                           | 0.07      | 10.03          | <.001    | .43                          | .04       | 10.35          | <.001    |
| <b>Social Anxiety</b>              | MASC SA C      | 0.83                           | 0.07      | 12.46          | <.001    | .45                          | .03       | 13.33          | <.001    |
|                                    | MASC SA P      | 0.83                           | 0.07      | 12.46          | <.001    | .47                          | .04       | 13.40          | <.001    |
| <b>Separation Anxiety</b>          | MASC SP C      | 0.88                           | 0.05      | 17.60          | <.001    | .61                          | .03       | 19.03          | <.001    |
|                                    | MASC SP P      | 0.88                           | 0.05      | 17.60          | <.001    | .55                          | .03       | 19.27          | <.001    |
| <b>Conduct Problems</b>            | YSR CD C       | 0.71                           | 0.10      | 7.05           | <.001    | .28                          | .04       | 6.99           | <.001    |
|                                    | CBCL CD P      | 0.71                           | 0.10      | 7.05           | <.001    | .28                          | .04       | 6.91           | <.001    |
| <b>Oppositional Defiant</b>        | YSR ODD C      | 0.54                           | 0.08      | 6.61           | <.001    | .27                          | .04       | 6.64           | <.001    |
|                                    | CBCL ODD P     | 0.54                           | 0.08      | 6.61           | <.001    | .27                          | .04       | 6.50           | <.001    |
| <b>Aggression</b>                  | EATQ AG C      | 0.45                           | 0.17      | 2.65           | .008     | .38                          | .05       | 8.08           | <.001    |
|                                    | EATQ AG P      | 0.45                           | 0.17      | 2.65           | .008     | .32                          | .04       | 8.03           | <.001    |
| <b>Parent Report Method Factor</b> | CDI P          | 1.00                           | 0.00      | -              | -        | .45                          | .04       | 11.11          | <.001    |
|                                    | MASC PH P      | 0.34                           | 0.09      | 3.79           | <.001    | .18                          | .05       | 3.39           | <.001    |
|                                    | MASC SA P      | 0.47                           | 0.11      | 4.42           | <.001    | .21                          | .05       | 4.08           | <.001    |
|                                    | MASC SP P      | -0.24                          | 0.12      | -2.06          | .04      | -.12                         | .05       | -2.28          | .02      |
|                                    | CBCL CD P      | 2.37                           | 0.23      | 10.22          | <.001    | .73                          | .03       | 25.12          | <.001    |
|                                    | CBCL ODD P     | 1.79                           | 0.17      | 10.25          | <.001    | .68                          | .03       | 22.56          | <.001    |
|                                    | EATQ AG P      | 1.77                           | 0.20      | 8.95           | <.001    | .57                          | .05       | 12.59          | <.001    |
|                                    | SNAP Hyp. P    | 0.77                           | 0.10      | 7.53           | <.001    | .36                          | .05       | 7.91           | <.001    |
|                                    | SNAP Inatt. P  | 1.27                           | 0.15      | 8.58           | <.001    | .45                          | .04       | 10.48          | <.001    |
| <b>Child Report Method Factor</b>  | CDI C          | 1.00                           | 0.00      | -              | -        | .47                          | .04       | 12.05          | <.001    |
|                                    | MASC PH C      | 0.25                           | 0.09      | 2.74           | .006     | .12                          | .05       | 2.57           | .01      |
|                                    | MASC SA C      | 0.12                           | 0.10      | 1.24           | .21      | .06                          | .05       | 1.20           | .23      |
|                                    | MASC SP C      | -0.62                          | 0.12      | -5.24          | <.001    | -.38                         | .05       | -7.22          | <.001    |
|                                    | YSR CD C       | 2.14                           | 0.20      | 10.66          | <.001    | .75                          | .03       | 24.82          | <.001    |
|                                    | YSR ODD C      | 1.22                           | 0.12      | 10.15          | <.001    | .55                          | .03       | 16.22          | <.001    |
|                                    | EATQ AG C      | 1.25                           | 0.15      | 8.60           | <.001    | .53                          | .04       | 11.97          | <.001    |
| <b>Predictor</b>                   | <b>Outcome</b> | <b>Unstandardized Estimate</b> | <b>SE</b> | <b>Est./SE</b> | <b>p</b> | <b>Standardized Estimate</b> | <b>SE</b> | <b>Est./SE</b> | <b>p</b> |
| <b>Physical Sx</b>                 | Aggression     | 0.20                           | 0.22      | 0.90           | .37      | .12                          | .11       | 1.03           | .30      |
| <b>Social Anxiety</b>              | Aggression     | 0.27                           | 0.23      | 1.16           | .25      | .15                          | .11       | 1.47           | .14      |
| <b>Separation</b>                  | Aggression     | -0.08                          | 0.18      | -0.47          | .64      | -.05                         | .10       | -0.49          | .63      |
| <b>Depression</b>                  | Aggression     | -0.11                          | 0.22      | -0.48          | .63      | -.06                         | .13       | -0.46          | .65      |
| <b>Oppositional Conduct</b>        | Aggression     | 0.80                           | 0.54      | 1.50           | .13      | .46                          | .16       | 2.95           | .003     |
| <b>SNAP Inatt. P</b>               | Aggression     | 1.00                           | 0.60      | 1.67           | .10      | .58                          | .15       | 3.96           | <.001    |
| <b>SNAP Hyp. P</b>                 | Aggression     | -0.10                          | 0.08      | -1.29          | .20      | -.13                         | .09       | -1.41          | .16      |
| <b>SNAP Hyp. P</b>                 | Aggression     | 0.16                           | 0.12      | 1.35           | .18      | .15                          | .09       | 1.71           | .09      |
| <b>Pubertal Timing</b>             | Aggression     | -0.25                          | 0.21      | -1.20          | .23      | -.14                         | .11       | -1.31          | .19      |
| <b>Gender</b>                      | Aggression     | -0.37                          | 0.28      | -1.30          | .19      | -.11                         | .07       | -1.54          | .12      |
| 0=male,1=female                    |                |                                |           |                |          |                              |           |                |          |
| <b>Timing x Gender</b>             | Aggression     | -0.17                          | 0.25      | -0.70          | .48      | -.08                         | .10       | -0.72          | .47      |

| <b>Predictor</b>        | <b>Factor</b>               | <b>Covariance</b> | <b>SE</b> | <b>Est./SE</b> | <b>p</b> | <b>Correlation</b> | <b>SE</b> | <b>Est./SE</b> | <b>p</b> |
|-------------------------|-----------------------------|-------------------|-----------|----------------|----------|--------------------|-----------|----------------|----------|
| <b>Pubertal Timing*</b> | Parent Report Method Factor | 0.02              | 0.04      | 0.53           | .60      | .03                | .05       | 0.53           | .60      |



## PUBERTAL TIMING TRANSDIAGNOSTIC

58

|                                      |                                   |       |      |       |       |      |     |       |       |
|--------------------------------------|-----------------------------------|-------|------|-------|-------|------|-----|-------|-------|
|                                      | Child Report<br>Method<br>Factor  | 0.34  | 0.06 | 6.13  | <.001 | .39  | .04 | 8.95  | <.001 |
| <b>Pubertal Timing x<br/>Gender*</b> | Parent Report<br>Method<br>Factor | -0.02 | 0.03 | -0.69 | .49   | -.04 | .05 | -0.69 | .49   |
|                                      | Child Report<br>Method<br>Factor  | 0.18  | 0.04 | 4.51  | <.001 | .27  | .05 | 5.87  | <.001 |

*Note:* C = Child self-report; P = Parent report; CDI = Children's Depression Inventory; MASC = Manifest Anxiety Scale for Children; SA = social anxiety; PH = physical symptoms; SP = separation/panic symptoms; CBCL/YSR = Child Behavior Checklist/Youth Self Report; ODD = oppositional defiant disorder symptoms; CD = conduct disorder symptoms; EATQ = Early Adolescent Temperament Questionnaire; AG = aggression; SNAP = Swanson, Nolan, and Pelham scale; Inatt. = inattention; Hyp. = hyperactivity. \*Sensitivity analyses showed that model parameters were not appreciably different when covariance between predictors and method factors was constrained to zero.

PUBERTAL TIMING TRANSDIAGNOSTIC

| Factor | Indicator | Unstandardized | SE | Est./ | <i>p</i> | Standardized | SE | Est./ | <i>p</i> |
|--------|-----------|----------------|----|-------|----------|--------------|----|-------|----------|
|--------|-----------|----------------|----|-------|----------|--------------|----|-------|----------|

Table S9. Syndrome based model (controlling for other syndromes) – ADHD Hyperactivity.

## PUBERTAL TIMING TRANSDIAGNOSTIC

60

|                                           |                      | Loading                        |           |                |          | SE                           |           |                |          |
|-------------------------------------------|----------------------|--------------------------------|-----------|----------------|----------|------------------------------|-----------|----------------|----------|
| <b>Depression</b>                         | CDI C                | 0.71                           | 0.06      | 12.02          | <.001    | .37                          | .03       | 12.21          | <.001    |
|                                           | CDI P                | 0.71                           | 0.06      | 12.02          | <.001    | .42                          | .03       | 12.30          | <.001    |
| <b>Physical Symptoms (Anxiety)</b>        | MASC PH C            | 0.64                           | 0.07      | 9.86           | <.001    | .36                          | .04       | 10.21          | <.001    |
|                                           | MASC PH P            | 0.64                           | 0.07      | 9.86           | <.001    | .43                          | .04       | 10.18          | <.001    |
| <b>Social Anxiety</b>                     | MASC SA C            | 0.81                           | 0.07      | 12.08          | <.001    | .44                          | .03       | 12.90          | <.001    |
|                                           | MASC SA P            | 0.81                           | 0.07      | 12.08          | <.001    | .46                          | .04       | 12.97          | <.001    |
| <b>Separation Anxiety</b>                 | MASC SP C            | 0.92                           | 0.05      | 18.34          | <.001    | .61                          | .03       | 19.97          | .001     |
|                                           | MASC SP P            | 0.92                           | 0.05      | 18.34          | <.001    | .58                          | .03       | 20.79          | .001     |
| <b>Conduct Problems</b>                   | YSR CD C             | 0.64                           | 0.10      | 6.63           | <.001    | .25                          | .04       | 6.58           | <.001    |
|                                           | CBCL CD P            | 0.64                           | 0.10      | 6.63           | <.001    | .25                          | .04       | 6.49           | <.001    |
| <b>Oppositional Defiant</b>               | YSR ODD C            | 0.53                           | 0.08      | 6.74           | <.001    | .27                          | .04       | 6.77           | <.001    |
|                                           | CBCL ODD P           | 0.53                           | 0.08      | 6.74           | <.001    | .27                          | .04       | 6.65           | <.001    |
| <b>Aggression</b>                         | EATQ AG C            | 0.58                           | 0.10      | 5.76           | <.001    | .28                          | .05       | 5.75           | .001     |
|                                           | EATQ AG P            | 0.58                           | 0.10      | 5.76           | <.001    | .24                          | .04       | 5.74           | .001     |
| <b>Parent Report Method Factor</b>        | CDI P                | 1.00                           | 0.00      | -              | -        | .45                          | .04       | 11.45          | <.001    |
|                                           | MASC PH P            | 0.35                           | 0.09      | 3.91           | <.001    | .18                          | .05       | 3.53           | <.001    |
|                                           | MASC SA P            | 0.54                           | 0.11      | 5.00           | <.001    | .23                          | .05       | 4.71           | <.001    |
|                                           | MASC SP P            | -0.16                          | 0.11      | -1.41          | .16      | -.08                         | .05       | -1.50          | .13      |
|                                           | CBCL CD P            | 2.48                           | 0.23      | 10.92          | <.001    | .75                          | .03       | 28.87          | <.001    |
|                                           | CBCL ODD P           | 1.90                           | 0.17      | 10.92          | <.001    | .70                          | .03       | 25.58          | <.001    |
|                                           | EATQ AG P            | 2.03                           | 0.20      | 10.28          | <.001    | .64                          | .03       | 20.08          | <.001    |
|                                           | SNAP Hyp. P          | 0.53                           | 0.15      | 3.69           | <.001    | .24                          | .06       | 3.78           | <.001    |
| SNAP Inatt. P                             | 1.30                 | 0.15                           | 8.73      | <.001          | .44      | .04                          | 10.86     | <.001          |          |
| <b>Child Report Method Factor</b>         | CDI C                | 1.00                           | 0.00      | -              | -        | .44                          | .04       | 11.14          | <.001    |
|                                           | MASC PH C            | 0.22                           | 0.10      | 2.34           | .02      | .11                          | .05       | 2.19           | .03      |
|                                           | MASC SA C            | 0.04                           | 0.10      | 0.43           | .67      | .02                          | .05       | 0.42           | .68      |
|                                           | MASC SP C            | -0.57                          | 0.12      | -4.75          | <.001    | -.32                         | .05       | -6.44          | <.001    |
|                                           | YSR CD C             | 2.33                           | 0.23      | 10.03          | <.001    | .77                          | .03       | 26.32          | <.001    |
|                                           | YSR ODD C            | 1.25                           | 0.13      | 9.80           | <.001    | .54                          | .04       | 15.75          | <.001    |
|                                           | EATQ AG C            | 1.37                           | 0.14      | 9.60           | <.001    | .56                          | .03       | 16.54          | <.001    |
| <b>Predictor</b>                          | <b>Outcome</b>       | <b>Unstandardized Estimate</b> | <b>SE</b> | <b>Est./SE</b> | <b>p</b> | <b>Standardized Estimate</b> | <b>SE</b> | <b>Est./SE</b> | <b>p</b> |
| <b>Aggression</b>                         | SNAP Hyp P           | -0.20                          | 0.15      | -1.31          | .19      | -.12                         | .09       | -1.31          | .19      |
| <b>Physical Sx</b>                        | SNAP Hyp P           | -0.16                          | 0.09      | -1.73          | .08      | -.10                         | .06       | -1.72          | .09      |
| <b>Social Anxiety</b>                     | SNAP Hyp P           | -0.53                          | 0.09      | -5.89          | <.001    | -.31                         | .05       | -5.93          | <.001    |
| <b>Depression</b>                         | SNAP Hyp P           | -0.21                          | 0.10      | -2.04          | .04      | -.12                         | .06       | -2.04          | .04      |
| <b>Oppositional Conduct</b>               | SNAP Hyp P           | -0.29                          | 0.16      | -1.83          | .07      | -.17                         | .10       | -1.84          | .07      |
| <b>Separation</b>                         | SNAP Hyp P           | -0.09                          | 0.09      | -0.99          | .32      | -.05                         | .05       | -0.99          | .32      |
| <b>SNAP Inatt. P</b>                      | SNAP Hyp P           | 0.19                           | 0.03      | 6.06           | <.001    | .25                          | .04       | 6.14           | <.001    |
| <b>Pubertal Timing</b>                    | SNAP Hyp P           | -0.13                          | 0.10      | -1.29          | .20      | -.08                         | .06       | -1.28          | .20      |
| <b>Gender</b>                             | SNAP Hyp P           | -0.03                          | 0.11      | -0.29          | .77      | -.01                         | .03       | -0.29          | .77      |
| 0=male,1=female<br><b>Timing x Gender</b> | SNAP Hyp P           | -0.11                          | 0.12      | -0.89          | .38      | -.05                         | .06       | -0.88          | .38      |
| <b>Predictor</b>                          | <b>Factor</b>        | <b>Covariance</b>              | <b>SE</b> | <b>Est./SE</b> | <b>p</b> | <b>Correlation</b>           | <b>SE</b> | <b>Est./SE</b> | <b>p</b> |
| <b>Pubertal Timing*</b>                   | Parent Report Method | -0.06                          | 0.04      | -1.44          | .15      | -.08                         | .05       | -1.46          | .15      |

60

## PUBERTAL TIMING TRANSDIAGNOSTIC

|                                      | Factor                            |       |      |       |       |      |     |       |       |
|--------------------------------------|-----------------------------------|-------|------|-------|-------|------|-----|-------|-------|
|                                      | Child Report<br>Method<br>Factor  | 0.19  | 0.05 | 3.84  | <.001 | .23  | .05 | 4.36  | <.001 |
| <b>Pubertal Timing x<br/>Gender*</b> | Parent Report<br>Method<br>Factor | -0.07 | 0.03 | -2.13 | .03   | -.12 | .05 | -2.20 | .02   |
|                                      | Child Report<br>Method<br>Factor  | 0.09  | 0.04 | 2.51  | .01   | .14  | .06 | 2.64  | .01   |

*Note:* C = Child self-report; P = Parent report; CDI = Children's Depression Inventory; MASC = Manifest Anxiety Scale for Children; SA = social anxiety; PH = physical symptoms; SP = separation/panic symptoms; CBCL/YSR = Child Behavior Checklist/Youth Self Report; ODD = oppositional defiant disorder symptoms; CD = conduct disorder symptoms; EATQ = Early Adolescent Temperament Questionnaire; AG = aggression; SNAP = Swanson, Nolan, and Pelham scale; Inatt. = inattention; Hyp. = hyperactivity. \*Sensitivity analyses showed that model parameters were not appreciably different when covariance between predictors and method factors was constrained to zero.

## PUBERTAL TIMING TRANSDIAGNOSTIC

| Factor                             | Indicator   | Unstandardized Loading | SE   | Est./ SE | p     | Standardized Loading | SE   | Est./ SE | p     |
|------------------------------------|-------------|------------------------|------|----------|-------|----------------------|------|----------|-------|
| <b>Depression</b>                  | CDI C       | 0.74                   | 0.06 | 12.76    | <.001 | .39                  | .03  | 13.01    | <.001 |
|                                    | CDI P       | 0.74                   | 0.06 | 12.76    | <.001 | .44                  | .03  | 13.24    | <.001 |
| <b>Physical Symptoms (Anxiety)</b> | MASC PH C   | 0.64                   | 0.07 | 9.91     | <.001 | .36                  | .04  | 10.29    | <.001 |
|                                    | MASC PH P   | 0.64                   | 0.07 | 9.91     | <.001 | .43                  | .04  | 10.20    | <.001 |
| <b>Social Anxiety</b>              | MASC SA C   | 0.83                   | 0.07 | 12.56    | <.001 | .46                  | .03  | 13.43    | <.001 |
|                                    | MASC SA P   | 0.83                   | 0.07 | 56       | <.001 | .47                  | .04  | 13.58    | <.001 |
| <b>Separation Anxiety</b>          | MASC SP C   | 0.91                   | 0.05 | 18.32    | <.001 | .61                  | .03  | 20.20    | <.001 |
|                                    | MASC SP P   | 0.91                   | 0.05 | 18.32    | <.001 | .58                  | .03  | 20.48    | <.001 |
| <b>Conduct Problems</b>            | YSR CD C    | 0.63                   | 0.10 | 6.25     | <.001 | .25                  | .04  | 6.18     | <.001 |
|                                    | CBCL CD P   | 0.63                   | 0.10 | 6.25     | <.001 | .25                  | .04  | 6.15     | <.001 |
| <b>Oppositional Defiant</b>        | YSR ODD C   | 0.51                   | 0.08 | 6.21     | <.001 | .25                  | .04  | 6.22     | <.001 |
|                                    | CBCL ODD P  | 0.51                   | 0.08 | 6.21     | <.001 | .25                  | .04  | 6.13     | <.001 |
| <b>Aggression</b>                  | EATQ AG C   | 0.56                   | 0.10 | 5.43     | <.001 | .27                  | .05  | 5.42     | <.001 |
|                                    | EATQ AG P   | 0.56                   | 0.10 | 5.43     | <.001 | .23                  | .04  | 5.41     | <.001 |
| <b>Parent Report Method Factor</b> | CDI P       | 1.00                   | 0.00 | -        | -     | .43                  | .04  | 11.05    | <.001 |
|                                    | MASC PH P   | 0.37                   | 0.09 | 3.94     | <.001 | .18                  | .05  | 3.56     | <.001 |
|                                    | MASC SA P   | 0.53                   | 0.11 | 4.75     | <.001 | .223                 | .05  | 4.47     | <.001 |
|                                    | MASC SP P   | -0.17                  | 0.12 | -1.43    | .15   | -.08                 | .05  | -1.53    | .13   |
|                                    | CBCL CD P   | 2.60                   | 0.24 | 10.72    | <.001 | .75                  | .03  | 28.27    | <.001 |
|                                    | CBCL ODD P  | 1.99                   | 0.19 | 10.61    | <.001 | .71                  | .03  | 25.72    | <.001 |
|                                    | EATQ AG P   | 2.10                   | 0.21 | 10.02    | <.001 | .63                  | .03  | 19.75    | <.001 |
|                                    | SNAP Hyp. P | 0.78                   | 0.11 | 3.26     | <.001 | .34                  | .04  | 7.67     | <.001 |
| SNAP Inatt. P                      | 0.61        | 0.19                   | 7.28 | <.001    | .20   | .06                  | 3.27 | .001     |       |
| <b>Child Report Method Factor</b>  | CDI C       | 1.00                   | 0.00 | -        | -     | .44                  | .04  | 11.30    | <.001 |
|                                    | MASC PH C   | 0.21                   | 0.10 | 2.17     | .03   | .10                  | .05  | 2.05     | .04   |
|                                    | MASC SA C   | 0.05                   | 0.10 | 0.48     | .63   | .02                  | .05  | 0.48     | .64   |
|                                    | MASC SP C   | -0.58                  | 0.12 | -4.84    | <.001 | -.332                | .05  | -6.50    | <.001 |
|                                    | YSR CD C    | 2.35                   | 0.23 | 10.17    | <.001 | .78                  | .03  | 26.31    | <.001 |

Table S10. Syndrome based model (controlling for other syndromes) – ADHD Inattention.

## PUBERTAL TIMING TRANSDIAGNOSTIC

| Predictor                        | Outcome                     | Unstandardized Estimate | SE   | Est./SE | p     | Standardized Estimate | SE  | Est./SE | p     |
|----------------------------------|-----------------------------|-------------------------|------|---------|-------|-----------------------|-----|---------|-------|
|                                  | YSR ODD C                   | 1.26                    | 0.13 | 9.85    | <.001 | .54                   | .03 | 15.83   | <.001 |
|                                  | EATQ AG C                   | 1.39                    | 0.14 | 9.72    | <.001 | .56                   | .03 | 16.71   | <.001 |
| <b>Aggression</b>                | SNAP Inatt P                | -0.09                   | 0.20 | -0.42   | .67   | -.04                  | .09 | -0.42   | .67   |
| <b>Physical Sx</b>               | SNAP Inatt P                | -0.42                   | 0.12 | -3.74   | .001  | -.18                  | .05 | -3.49   | <.001 |
| <b>Social Anxiety</b>            | SNAP Inatt P                | 0.10                    | 0.11 | 0.86    | 0.39  | .04                   | .05 | 0.87    | 0.39  |
| <b>Depression</b>                | SNAP Inatt P                | 0.48                    | 0.13 | 3.85    | <.001 | .21                   | .06 | 3.87    | <.001 |
| <b>Oppositional Conduct</b>      | SNAP Inatt P                | 0.16                    | 0.22 | 0.76    | .45   | .07                   | .09 | 0.76    | .45   |
| <b>SNAP Hyp P</b>                | SNAP Inatt P                | 0.35                    | 0.23 | 1.48    | .14   | .15                   | .10 | 1.48    | .14   |
|                                  | SNAP Inatt P                | 0.42                    | 0.05 | 83.15   | <.001 | .31                   | .04 | 8.65    | <.001 |
| <b>Pubertal Timing</b>           | SNAP Inatt P                | -0.27                   | 0.13 | -2.15   | .03   | -.12                  | .06 | -2.15   | .03   |
| <b>Gender</b>                    | SNAP Inatt P                | -0.60                   | 0.14 | -4.25   | <.001 | -.13                  | .03 | -4.22   | <.001 |
| 0=male,1=female                  |                             |                         |      |         |       |                       |     |         |       |
| <b>Timing x Gender</b>           | SNAP Inatt P                | 0.05                    | 0.16 | 0.31    | .76   | .02                   | .05 | 0.31    | .76   |
| Predictor                        | Factor                      | Covariance              | SE   | Est./SE | p     | Correlation           | SE  | Est./SE | p     |
| <b>Pubertal Timing*</b>          | Parent Report Method Factor | -0.04                   | 0.04 | -1.15   | .25   | -.06                  | .05 | -1.17   | .24   |
|                                  | Child Report Method Factor  | 0.20                    | 0.05 | 4.00    | <.001 | .24                   | .05 | 4.61    | <.001 |
| <b>Pubertal Timing x Gender*</b> | Parent Report Method Factor | -0.06                   | 0.03 | -1.94   | .05   | -.11                  | .05 | -1.99   | .05   |
|                                  | Child Report Method Factor  | 0.10                    | 0.04 | 2.67    | .01   | .15                   | .05 | 2.82    | .005  |

Note: C = Child self-report; P = Parent report; CDI = Children's Depression Inventory; MASC = Manifest Anxiety Scale for Children; SA = social anxiety; PH = physical symptoms; SP = separation/panic symptoms; CBCL/YSR = Child Behavior Checklist/Youth Self Report; ODD = oppositional defiant disorder symptoms; CD = conduct disorder symptoms; EATQ = Early Adolescent Temperament Questionnaire; AG = aggression; SNAP = Swanson, Nolan, and Pelham scale; Inatt. = inattention; Hyp. = hyperactivity. \*Sensitivity analyses showed that model parameters were not appreciably different when covariance between predictors and method factors was constrained to zero.

## PUBERTAL TIMING TRANSDIAGNOSTIC

Table S11. Internalizing and Externalizing model.

| Factor                             | Indicator            | Unstandardized Loading | SE        | Est./ SE     | p        | Standardized Loading | SE        | Est./ SE     | p        |
|------------------------------------|----------------------|------------------------|-----------|--------------|----------|----------------------|-----------|--------------|----------|
| <b>Depression</b>                  | CDI C                | 0.52                   | 0.08      | 6.91         | <.001    | .43                  | .04       | 12.09        | <.001    |
|                                    | CDI P                | 0.52                   | 0.08      | 6.91         | <.001    | .48                  | .04       | 11.53        | <.001    |
| <b>Physical Symptoms (Anxiety)</b> | MASC PH C            | 0.49                   | 0.09      | 5.53         | <.001    | .49                  | .03       | 14.59        | <.001    |
|                                    | MASC PH P            | 0.49                   | 0.09      | 5.53         | <.001    | .59                  | .04       | 14.36        | <.001    |
| <b>Social Anxiety</b>              | MASC SA C            | 0.73                   | 0.08      | 9.41         | <.001    | .55                  | .03       | 16.97        | <.001    |
|                                    | MASC SA P            | 0.73                   | 0.08      | 9.41         | <.001    | .57                  | .03       | 17.00        | <.001    |
| <b>Separation Anxiety</b>          | MASC SP C            | 0.92                   | 0.05      | 19.45        | <.001    | .70                  | .04       | 17.38        | <.001    |
|                                    | MASC SP P            | 0.92                   | 0.05      | 19.45        | <.001    | .64                  | .04       | 17.66        | <.001    |
| <b>Conduct Problems</b>            | YSR CD C             | 0.46                   | 0.16      | 2.89         | .004     | .49                  | .03       | 16.48        | <.001    |
|                                    | CBCL CD P            | 0.46                   | 0.16      | 2.89         | .004     | .53                  | .04       | 14.47        | <.001    |
| <b>Oppositional Defiant</b>        | YSR ODD C            | 0.38                   | 0.13      | 2.82         | .005     | .48                  | .03       | 15.12        | <.001    |
|                                    | CBCL ODD P           | 0.38                   | 0.13      | 2.82         | .005     | .50                  | .04       | 13.12        | <.001    |
| <b>Aggression</b>                  | EATQ AG C            | 0.50                   | 0.13      | 3.80         | <.001    | .49                  | .04       | 13.80        | <.001    |
|                                    | EATQ AG P            | 0.50                   | 0.13      | 3.80         | <.001    | .44                  | .04       | 12.58        | <.001    |
| <b>Internalizing</b>               | Depression           | 1.04                   | 0.21      | 4.89         | <.001    | .78                  | .06       | 13.08        | <.001    |
|                                    | Physical Symptoms    | 1.30                   | 0.32      | 4.02         | <.001    | .84                  | .06       | 14.49        | <.001    |
|                                    | Social Anxiety       | 0.86                   | 0.16      | 5.41         | <.001    | .72                  | .06       | 11.74        | <.001    |
|                                    | Separation Anxiety   | 0.36                   | 0.10      | 3.54         | <.001    | .40                  | .09       | 4.32         | <.001    |
|                                    |                      |                        |           |              |          |                      |           |              |          |
| <b>Externalizing</b>               | Conduct Problems     | 2.58                   | 1.00      | 2.58         | .01      | .94                  | .05       | 20.87        | <.001    |
|                                    | Oppositional Defiant | 2.35                   | 0.92      | 2.56         | .01      | .93                  | .05       | 17.56        | <.001    |
|                                    | Aggression           | 1.75                   | 0.54      | 3.26         | .001     | .88                  | .06       | 13.94        | <.001    |
| <b>Parent Report Method Factor</b> | CDI P                | 1.00                   | 0.00      | -            | -        | .47                  | .05       | 9.86         | <.001    |
|                                    | MASC PH P            | 0.31                   | 0.10      | 3.12         | .002     | .16                  | .06       | 2.68         | .007     |
|                                    | MASC SA P            | 0.11                   | 3.22      | .001         | .16      |                      | .06       | 2.85         | .004     |
|                                    | MASC SP P            | -0.41                  | 0.16      | -2.50        | .01      | -.21                 | .07       | -3.08        | .002     |
|                                    | CBCL CD P            | 1.57                   | 0.18      | 8.83         | <.001    | .52                  | .05       | 10.86        | <.001    |
|                                    | CBCL ODD P           | 1.14                   | 0.14      | 8.30         | <.001    | .47                  | .05       | 9.19         | <.001    |
|                                    | EATQ AG P            | 1.59                   | 0.18      | 8.66         | <.001    | .46                  | .05       | 9.44         | <.001    |
|                                    | SNAP Hyp. P          | 1.00                   | 0.12      | 8.15         | <.001    | .50                  | .05       | 10.87        | <.001    |
|                                    | SNAP Inatt. P        | 1.32                   | 0.17      | 7.90         | <.001    | .60                  | .04       | 14.56        | <.001    |
| <b>Child Report Method Factor</b>  | CDI C                | 1.00                   | 0.00      | -            | -        | .41                  | .04       | 9.76         | <.001    |
|                                    | MASC PH C            | 0.11                   | 0.11      | 0.94         | .35      | .05                  | .05       | 0.90         | .37      |
|                                    | MASC SA C            | -0.01                  | 0.12      | -            | .91      | -0.01                | .05       | -0.11        | .91      |
|                                    |                      |                        |           |              | 0.111    |                      |           |              |          |
|                                    | MASC SP C            | -0.76                  | 0.14      | -5.57        | <.001    | -.43                 | .04       | -10.32       | <.001    |
|                                    | YSR CD C             | 2.10                   | 0.22      | 9.59         | <.001    | .64                  | .03       | 19.55        | <.001    |
|                                    | YSR ODD C            | 1.17                   | 0.14      | 8.31         | <.001    | .46                  | .04       | 12.28        | <.001    |
|                                    | EATQ AG C            | 1.19                   | 0.15      | 8.15         | <.001    | .45                  | .04       | 11.91        | <.001    |
| <b>Predictor</b>                   | <b>Outcome</b>       | <b>Unstandardized</b>  | <b>SE</b> | <b>Est./</b> | <b>p</b> | <b>Standardized</b>  | <b>SE</b> | <b>Est./</b> | <b>p</b> |

## PUBERTAL TIMING TRANSDIAGNOSTIC

|                                      |                                | Estimate          | SE          | Estimate            | SE              |                    |            |                     |                 |
|--------------------------------------|--------------------------------|-------------------|-------------|---------------------|-----------------|--------------------|------------|---------------------|-----------------|
| <b>Pubertal Timing</b>               | <b>Internalizing</b>           | <b>0.63</b>       | <b>0.15</b> | <b>4.22</b>         | <b>&lt;.001</b> | <b>.51</b>         | <b>.11</b> | <b>4.79</b>         | <b>&lt;.001</b> |
|                                      | <b>Externalizing</b>           | <b>0.35</b>       | <b>0.11</b> | <b>3.30</b>         | <b>.001</b>     | <b>.33</b>         | <b>.10</b> | <b>3.45</b>         | <b>.001</b>     |
| <b>Gender</b><br>0=male,1=female     | <b>Internalizing</b>           | <b>0.81</b>       | <b>0.16</b> | <b>4.95</b>         | <b>&lt;.001</b> | <b>.33</b>         | <b>.06</b> | <b>5.54</b>         | <b>&lt;.001</b> |
|                                      | <b>Externalizing</b>           | 0.13              | 0.12        | 1.12                | .26             | .06                | .06        | 1.13                | .26             |
| <b>Timing x Gender</b>               | <b>Internalizing</b>           | -0.09             | 0.19        | -0.49               | .63             | -0.06              | .12        | -0.49               | .63             |
|                                      | <b>Externalizing</b>           | -0.22             | 0.13        | -1.66               | .10             | -0.16              | .10        | -1.67               | .09             |
| <b>Predictor</b>                     | <b>Factor</b>                  | <b>Covariance</b> | <b>SE</b>   | <b>Est./<br/>SE</b> | <b>p</b>        | <b>Correlation</b> | <b>SE</b>  | <b>Est./<br/>SE</b> | <b>p</b>        |
| <b>Pubertal Timing*</b>              | Parent Report<br>Method Factor | 0.14              | 0.06        | 2.39                | .02             | .18                | .07        | 2.50                | .01             |
|                                      | Child Report<br>Method Factor  | 0.29              | 0.06        | 5.26                | <.001           | .36                | .05        | 6.83                | <.001           |
| <b>Pubertal Timing x<br/>Gender*</b> | Parent Report<br>Method Factor | 0.05              | 0.04        | 1.22                | .22             | .08                | .07        | 1.23                | .22             |
|                                      | Child Report<br>Method Factor  | 0.16              | 0.04        | 4.41                | <.001           | .27                | .05        | 5.23                | <.001           |

Note: C = Child self-report; P = Parent report; CDI = Children's Depression Inventory; MASC = Manifest Anxiety Scale for Children; SA = social anxiety; PH = physical symptoms; SP = separation/panic symptoms; CBCL/YSR = Child Behavior Checklist/Youth Self Report; ODD = oppositional defiant disorder symptoms; CD = conduct disorder symptoms; EATQ = Early Adolescent Temperament Questionnaire; AG = aggression; SNAP = Swanson, Nolan, and Pelham scale; Inatt. = inattention; Hyp. = hyperactivity. \* Sensitivity analyses showed that model parameters were not appreciably different when covariance between predictors and method factors was constrained to zero.



## PUBERTAL TIMING TRANSDIAGNOSTIC

66

Table S12. P-factor model.

| Factor                             | Indicator                     | Unstandardized Loading | SE   | Est./SE | p     | Standardized Loading | SE  | Est./SE | p     |       |
|------------------------------------|-------------------------------|------------------------|------|---------|-------|----------------------|-----|---------|-------|-------|
| <b>Depression</b>                  | CDI C                         | 0.42                   | 0.10 | 4.25    | <.001 | .67                  | .04 | 17.16   | <.001 |       |
|                                    | CDI P                         | 0.42                   | 0.10 | 4.25    | <.001 | .76                  | .04 | 19.19   | <.001 |       |
| <b>Physical Symptoms (Anxiety)</b> | MASC PH C                     | 0.57                   | 0.07 | 7.93    | <.001 | .58                  | .04 | 16.08   | <.001 |       |
|                                    | MASC PH P                     | 0.57                   | 0.07 | 7.93    | <.001 | .70                  | .04 | 16.64   | <.001 |       |
| <b>Social Anxiety</b>              | MASC SA C                     | 0.64                   | 0.09 | 7.14    | <.001 | .61                  | .04 | 16.72   | <.001 |       |
|                                    | MASC SA P                     | 0.64                   | 0.09 | 7.14    | <.001 | .63                  | .04 | 16.49   | <.001 |       |
| <b>Separation Anxiety</b>          | MASC SP C                     | 0.88                   | 0.05 | 18.19   | <.001 | .67                  | .04 | 18.77   | <.001 |       |
|                                    | MASC SP P                     | 0.88                   | 0.05 | 18.19   | <.001 | .62                  | .03 | 18.36   | <.001 |       |
| <b>Conduct Problems</b>            | YSR CD C                      | 0.43                   | 0.20 | 2.12    | .03   | .70                  | .05 | 13.67   | <.001 |       |
|                                    | CBCL CD P                     | 0.43                   | 0.20 | 2.12    | .03   | .70                  | .05 | 14.23   | <.001 |       |
| <b>Oppositional Defiant</b>        | YSR ODD C                     | 0.46                   | 0.10 | 4.82    | <.001 | .70                  | .05 | 14.09   | <.001 |       |
|                                    | CBCL ODD P                    | 0.46                   | 0.10 | 4.82    | <.001 | .67                  | .05 | 13.36   | <.001 |       |
| <b>Aggression</b>                  | EATQ AG C                     | 0.57                   | 0.11 | 5.40    | <.001 | .65                  | .05 | 12.11   | <.001 |       |
|                                    | EATQ AG P                     | 0.57                   | 0.11 | 5.40    | <.001 | .56                  | .05 | 11.42   | <.001 |       |
| <b>P Factor</b>                    | Depression                    | 2.20                   | 0.57 | 3.84    | <.001 | .76                  | .05 | 15.61   | <.001 |       |
|                                    | Physical Symptoms             | 0.93                   | 0.18 | 5.02    | <.001 | .53                  | .07 | 7.57    | <.001 |       |
|                                    | Social Anxiety                | 0.42                   | 0.14 | 3.03    | .002  | .26                  | .08 | 3.35    | .001  |       |
|                                    | Conduct Problems              | 2.39                   | 1.17 | 2.05    | .04   | .62                  | .06 | 11.38   | <.001 |       |
|                                    | Oppositional Defiant          | 1.60                   | 0.38 | 4.19    | <.001 | .59                  | .06 | 10.70   | <.001 |       |
|                                    | Aggression                    | 1.25                   | 0.29 | 4.35    | <.001 | .58                  | .07 | 8.96    | <.001 |       |
|                                    | SNAP Hyp. P                   | 0.84                   | 0.07 | 11.51   | <.001 | .57                  | .04 | 12.90   | <.001 |       |
|                                    | SNAP Inatt. P                 | 1.33                   | 0.10 | 12.92   | <.001 | .67                  | .04 | 17.70   | <.001 |       |
|                                    | Internalizing-Specific        | 1.23                   | 0.35 | 3.53    | <.001 | .49                  | .07 | 7.14    | <.001 |       |
|                                    | Physical Symptoms             | 0.93                   | 0.18 | 5.13    | <.001 | .61                  | .06 | 9.63    | <.001 |       |
| <b>Internalizing-Specific</b>      | Social Anxiety                | 1.08                   | 0.24 | 4.45    | <.001 | .76                  | .06 | 13.38   | <.001 |       |
|                                    | Separation Anxiety            | 0.34                   | 0.11 | 3.25    | .001  | .40                  | .09 | 4.27    | <.001 |       |
|                                    | <b>Externalizing-Specific</b> | Conduct Problems       | 2.16 | 1.13    | 1.90  | .06                  | .64 | .06     | 10.46 | <.001 |
|                                    |                               | Oppositional Defiant   | 1.51 | 0.38    | 4.02  | <.001                | .63 | .06     | 11.29 | <.001 |
|                                    |                               | Aggression             | 1.14 | 0.28    | 4.13  | <.001                | .60 | .06     | 9.24  | <.001 |
| <b>Parent Report Method Factor</b> | CDI P                         | 1.00                   | 0.00 | -       | -     | .32                  | .06 | 5.73    | <.001 |       |
|                                    | MASC PH P                     | 0.42                   | 0.15 | 2.75    | .006  | .15                  | .06 | 2.38    | .02   |       |
|                                    | MASC SA P                     | 1.12                   | 0.20 | 5.47    | <.001 | .34                  | .06 | 5.73    | <.001 |       |
|                                    | MASC SP P                     | 0.15                   | 0.17 | 0.87    | .38   | .05                  | .06 | 0.84    | .40   |       |
|                                    | CBCL CD P                     | 2.91                   | 0.45 | 6.42    | <.001 | .64                  | .04 | 14.53   | <.001 |       |
|                                    | CBCL ODD P                    | 2.36                   | 0.38 | 6.16    | <.001 | .65                  | .04 | 14.79   | <.001 |       |
|                                    | EATQ AG P                     | 2.46                   | 0.41 | 6.06    | <.001 | .58                  | .05 | 12.74   | <.001 |       |
|                                    | SNAP Hyp. P                   | 0.73                   | 0.18 | 4.03    | <.001 | .25                  | .07 | 3.72    | <.001 |       |

66

## PUBERTAL TIMING TRANSDIAGNOSTIC

|                                   |                               |                                |             |                |                 |                              |            |                |                 |
|-----------------------------------|-------------------------------|--------------------------------|-------------|----------------|-----------------|------------------------------|------------|----------------|-----------------|
|                                   | SNAP Inatt. P                 | 1.13                           | 0.25        | 4.56           | <.001           | .29                          | .07        | 4.21           | <.001           |
| <b>Child Report Method Factor</b> | CDI C                         | 1.00                           | 0.00        | -              | -               | .35                          | .05        | 7.59           | <.001           |
|                                   | MASC PH C                     | -0.02                          | 0.15        | -0.16          | .87             | -.01                         | .06        | -0.16          | .87             |
|                                   | MASC SA C                     | -0.18                          | 0.16        | -1.17          | .24             | -.07                         | .05        | -1.29          | .20             |
|                                   | MASC SP C                     | -1.01                          | 0.20        | -4.97          | <.001           | -.49                         | .04        | -11.86         | <.001           |
|                                   | YSR CD C                      | 1.81                           | 0.24        | 7.47           | <.001           | .49                          | .04        | 11.11          | <.001           |
|                                   | YSR ODD C                     | 0.86                           | 0.15        | 5.90           | <.001           | .31                          | .05        | 6.65           | <.001           |
|                                   | EATQ AG C                     | 1.10                           | 0.18        | 6.16           | <.001           | .37                          | .05        | 7.70           | <.001           |
| <b>Predictor</b>                  | <b>Outcome</b>                | <b>Unstandardized Estimate</b> | <b>SE</b>   | <b>Est./SE</b> | <b>p</b>        | <b>Standardized Estimate</b> | <b>SE</b>  | <b>Est./SE</b> | <b>p</b>        |
| <b>Pubertal Timing</b>            | <b>p Factor</b>               | <b>0.48</b>                    | <b>0.13</b> | <b>3.68</b>    | <b>&lt;.001</b> | <b>.42</b>                   | <b>.11</b> | <b>4.04</b>    | <b>&lt;.001</b> |
|                                   | <b>Internalizing-specific</b> | <b>0.69</b>                    | <b>0.17</b> | <b>4.05</b>    | <b>&lt;.001</b> | <b>.53</b>                   | <b>.11</b> | <b>4.78</b>    | <b>&lt;.001</b> |
|                                   | <b>Externalizing-specific</b> | <b>0.88</b>                    | <b>0.20</b> | <b>4.35</b>    | <b>&lt;.001</b> | <b>.69</b>                   | <b>.12</b> | <b>5.52</b>    | <b>&lt;.001</b> |
| <b>Gender (0=male, 1=female)</b>  | <b>p Factor</b>               | <b>-0.38</b>                   | <b>0.12</b> | <b>-3.09</b>   | <b>.002</b>     | <b>-.17</b>                  | <b>.06</b> | <b>-3.09</b>   | <b>.002</b>     |
|                                   | <b>Internalizing-specific</b> | <b>1.03</b>                    | <b>0.18</b> | <b>5.70</b>    | <b>&lt;.001</b> | <b>.40</b>                   | <b>.06</b> | <b>6.77</b>    | <b>.01</b>      |
|                                   | <b>Externalizing-specific</b> | <b>0.40</b>                    | <b>0.16</b> | <b>2.45</b>    | <b>.01</b>      | <b>.16</b>                   | <b>.06</b> | <b>2.56</b>    | <b>.01</b>      |
| <b>Timing x Gender</b>            | <b>p Factor</b>               | <b>-0.08</b>                   | <b>0.15</b> | <b>-0.52</b>   | <b>.60</b>      | <b>-.05</b>                  | <b>.10</b> | <b>-0.52</b>   | <b>.60</b>      |
|                                   | <b>Internalizing-specific</b> | <b>-0.14</b>                   | <b>0.20</b> | <b>-0.70</b>   | <b>.48</b>      | <b>-.08</b>                  | <b>.12</b> | <b>-0.70</b>   | <b>.48</b>      |
|                                   | <b>Externalizing-specific</b> | <b>-0.29</b>                   | <b>0.24</b> | <b>-1.18</b>   | <b>.24</b>      | <b>-.17</b>                  | <b>.14</b> | <b>-1.20</b>   | <b>.23</b>      |
| <b>Predictor</b>                  | <b>Factor</b>                 | <b>Covariance</b>              | <b>SE</b>   | <b>Est./SE</b> | <b>p</b>        | <b>Correlation</b>           | <b>SE</b>  | <b>Est./SE</b> | <b>p</b>        |
| <b>Pubertal Timing*</b>           | Parent Report Method Factor   | -0.17                          | 0.06        | -2.80          | .005            | -.30                         | .09        | -3.51          | <.001           |
|                                   | Child Report Method Factor    | 0.01                           | 0.05        | 0.14           | .89             | .01                          | .08        | 0.14           | .89             |
| <b>Pubertal Timing x Gender*</b>  | Parent Report Method Factor   | -0.10                          | 0.04        | -2.46          | .02             | -.25                         | .09        | -2.97          | .003            |
|                                   | Child Report Method Factor    | 0.01                           | 0.04        | 0.28           | .78             | .02                          | .08        | 0.28           | .78             |

Note: C = Child self-report; P = Parent report; CDI = Children's Depression Inventory; MASC = Manifest Anxiety Scale for Children; SA = social anxiety; PH = physical symptoms; SP = separation/panic symptoms; CBCL/YSR = Child Behavior Checklist/Youth Self Report; ODD = oppositional defiant disorder symptoms; CD = conduct disorder symptoms; EATQ = Early Adolescent Temperament Questionnaire; AG = aggression; SNAP = Swanson, Nolan, and Pelham scale; Inatt. = inattention; Hyp. = hyperactivity. \* Sensitivity analyses showed that model parameters were not appreciably different when covariance between predictors and method factors was constrained to zero.

## PUBERTAL TIMING TRANSDIAGNOSTIC

68

Table S13. P-factor model with parent report only as syndrome indicators.

| Factor                           | Indicator                     | Unstandardized Loading  | SE          | Est./ SE     | p               | Standardized Loading  | SE         | Est./ SE     | p               |
|----------------------------------|-------------------------------|-------------------------|-------------|--------------|-----------------|-----------------------|------------|--------------|-----------------|
| <b>P Factor</b>                  | CDI P                         | 0.91                    | 0.09        | 10.14        | <.001           | .59                   | .05        | 10.96        | <.001           |
|                                  | MASC PH P                     | 0.50                    | 0.08        | 6.42         | <.001           | .37                   | .06        | 6.22         | <.001           |
|                                  | MASC SA P                     | 0.47                    | 0.09        | 5.43         | <.001           | .30                   | .06        | 5.52         | <.001           |
|                                  | CBCL CD P                     | 1.62                    | 0.14        | 11.96        | <.001           | .73                   | .06        | 11.97        | <.001           |
|                                  | CBCL ODD P                    | 1.25                    | 0.11        | 11.51        | <.001           | .70                   | .07        | 10.57        | <.001           |
|                                  | EATQ AG P                     | 1.35                    | 0.12        | 11.51        | <.001           | .65                   | .05        | 11.86        | <.001           |
|                                  | SNAP Hyp. P                   | 0.77                    | 0.08        | 9.32         | <.001           | .53                   | .06        | 8.68         | <.001           |
|                                  | SNAP Inatt. P                 | 1.15                    | 0.11        | 10.03        | <.001           | .59                   | .05        | 12.25        | <.001           |
| <b>Internalizing-Specific</b>    | CDI P                         | 0.51                    | 0.07        | 7.13         | <.001           | .39                   | .05        | 8.16         | <.001           |
|                                  | MASC PH P                     | 0.61                    | 0.09        | 6.87         | <.001           | .53                   | .06        | 8.64         | <.001           |
|                                  | MASC SA P                     | 0.45                    | 0.09        | 5.11         | <.001           | .35                   | .06        | 5.85         | <.001           |
|                                  | MASC SP P                     | 0.35                    | 0.12        | 2.87         | .004            | .30                   | .10        | 3.07         | .002            |
| <b>Externalizing-Specific</b>    | CBCL CD P                     | 1.05                    | 0.18        | 5.98         | <.001           | .42                   | .07        | 6.28         | <.001           |
|                                  | CBCL ODD P                    | 0.93                    | 0.13        | 7.24         | <.001           | .46                   | .06        | 7.54         | <.001           |
|                                  | EATQ AG P                     | 0.75                    | 0.15        | 4.96         | <.001           | .32                   | .06        | 5.13         | <.001           |
| Predictor                        | Factor                        | Covariance              | SE          | Est./ SE     | p               | Correlation           | SE         | Est./ SE     | p               |
| Predictor                        | Outcome                       | Unstandardized Estimate | SE          | Est./ SE     | p               | Standardized Estimate | SE         | Est./ SE     | p               |
| <b>Pubertal Timing</b>           | <b>p Factor</b>               | <b>0.65</b>             | <b>0.17</b> | <b>3.78</b>  | <b>&lt;.001</b> | <b>.56</b>            | <b>.12</b> | <b>4.52</b>  | <b>&lt;.001</b> |
|                                  | <b>Internalizing-specific</b> | <b>0.77</b>             | <b>0.21</b> | <b>3.65</b>  | <b>&lt;.001</b> | <b>.57</b>            | <b>.13</b> | <b>4.50</b>  | <b>&lt;.001</b> |
|                                  | Externalizing-specific        | -0.20                   | 0.19        | -0.11        | .91             | -.02                  | .18        | -.11         | .91             |
| <b>Gender (0=male, 1=female)</b> | <b>p Factor</b>               | <b>-0.47</b>            | <b>0.16</b> | <b>-2.99</b> | <b>.003</b>     | <b>-.20</b>           | <b>.07</b> | <b>-2.94</b> | <b>.003</b>     |
|                                  | <b>Internalizing-specific</b> | <b>0.92</b>             | <b>0.23</b> | <b>4.07</b>  | <b>&lt;.001</b> | <b>.34</b>            | <b>.07</b> | <b>4.54</b>  | <b>&lt;.001</b> |
|                                  | Externalizing-specific        | 0.33                    | 0.22        | 1.49         | .14             | .16                   | .11        | 1.53         | .13             |
| <b>Timing x Gender</b>           | p Factor                      | -0.25                   | 0.17        | -1.52        | 0.13            | -.17                  | .11        | -1.54        | .13             |
|                                  | Internalizing-specific        | 0.03                    | 0.23        | 0.14         | 0.89            | .02                   | .13        | .14          | .89             |
|                                  | Externalizing-specific        | -0.02                   | 0.19        | -0.08        | 0.93            | -.01                  | .14        | -.08         | .93             |

Note: C = Child self-report; P = Parent report; CDI = Children's Depression Inventory; MASC = Manifest Anxiety Scale for Children; SA = social anxiety; PH = physical symptoms; SP = separation/panic symptoms; CBCL/YSR = Child Behavior Checklist/Youth Self Report; ODD = oppositional defiant disorder symptoms; CD = conduct disorder symptoms; EATQ = Early Adolescent Temperament Questionnaire; AG = aggression; SNAP = Swanson, Nolan, and Pelham scale; Inatt. = inattention; Hyp. = hyperactivity.

|               | <i>Syndrome Model w/o Covariance</i> |      |            |          | <i>Depression, Controlling for Others</i> |      |            |          | <i>Physical Sx, Controlling for Others</i> |    |            |          | <i>Social Anx, Controlling for Others</i> |    |            |          | <i>Separation Anx, Controlling for Others</i> |    |            |          | <i>Conduct Disorder, Controlling for Others</i> |    |            |          |
|---------------|--------------------------------------|------|------------|----------|-------------------------------------------|------|------------|----------|--------------------------------------------|----|------------|----------|-------------------------------------------|----|------------|----------|-----------------------------------------------|----|------------|----------|-------------------------------------------------|----|------------|----------|
| <b>Factor</b> | Var                                  | SE   | Est/<br>SE | <i>p</i> | Var                                       | SE   | Est/<br>SE | <i>p</i> | Var                                        | SE | Est/<br>SE | <i>p</i> | Var                                       | SE | Est/<br>SE | <i>p</i> | Var                                           | SE | Est/<br>SE | <i>p</i> | Var                                             | SE | Est/<br>SE | <i>p</i> |
| Depression    | 1.28                                 | 0.14 | 9.04       | <.001    | 3.47                                      | 1.88 | 1.85       | .07      |                                            |    |            |          |                                           |    |            |          |                                               |    |            |          |                                                 |    |            |          |

Table S14. Variances for latent factors in syndrome, internalizing and externalizing, and p-factor models
